# Supplementary material for: Use of a hysterometer to measure the head–perineum distance before an operative delivery: a prospective study
Source: Research Square preprint supplement (doi:10.21203/rs.3.rs-7603641/v1), 2026-01-20
Supplement: Supplementary file 1 [file 5e30b2a306eb088b4b5b2d4f.xlsx]

## Sheet: Feuil1
Age	Ethnie	IMC (kgm2)	Gestité	Parité	ut cicat	ATCD LOSA	complication maternelle	complication fœtale	Mode d'entrée	Indication declmatu	Anesthésie	Oxytocine	Durée phase latence (h)	Durée phase active (h)	Durée stade 2 (h)	Stade 2	Présentation clinique	Hauteur clinique présentation	Réalisation Echographie	Présentation écho	Angle	Distance tête - sonde (mm)	Distance tête - vulve hystéromètre (mm)	Terme SA	Terme jours	GA	Head position	Head station	US Y/N	Position US	AOP	HPD US	HPD hm2	Instrument	Durée EE avt extraction (min)	Durée extraction (min)	Durée totale EE (min)	Indication extraction	Changement instrument	Indication changement	2ème changment	Mode	Indication césar	Délivrance	Episiotomie	Déchirure périnéale	Dystocie	EPS (mL)	HPP
36	1	25.8	1	0	0	0	0	0	0	0	1		0	2	3	1								41	2	41.2857	1	2	1	1	150	25	2	1			22	2	0			1		1	0	1	0	50	0
30		29.8	2	0	0	0	0	0	0	0	1		5	3	2	0								41	1	41.1429	1	1	1	1	174	44	1	1	10		25	2	0			1		1	0	1	0	50	0
34	4	20.6	2	1	1	0	0	0	0	0	1	1	2	5	2	0								38	3	38.4286	1	2	1	1	158	47	4	1	30	7	37	1	0			1		1	0	1	0	150	0
30	4	20.4	1	0	0	0	0	0	1	2	1		7	2	1	0								40	6	40.8571	1		1	1	170	3	3	1	45		60	3	3	3		1		1	1	1	0	200	0
30	1	22.5	1	0	0	0	0	0	0	0	1	1	10	7	3	1	3		1	3	142	40	4	40	3	40.4286	1	2	1	1	142	40	4	1	45			3	1	3	0	1		1	0	1	0	50	0
33	1	17.9	1	0	0	0	0	0	0	0	1		3	8	3	1	1		1	1	133	45	5	39	1	39.1429	1		1	1	133	45	5	1				1	0			1		1	0	1	0	200	0
32	2	22.6	2	1	0	0	0	0	0	0	1	0	0	2	0.75	0								38	2	38.2857	1	2	1	1	167	37	40	1			25	2	0			1		1	0	1	0	300	0
34	4	28.3	2	0	0	0	0	0	0	0	1		2	3	3	1								41	4	41.5714	1	0	1	1	145	64	5	1	35	10	45	1	1	3	0	1		1	0	1	0	100	0
37	4	21.5	4	3	0	0	0	0	1	7	1	1	8	5	3	1								40	3	40.4286	1	1	1	1	153	38	3	1			51	1	1	1	0	1		1	0	1	0	50	0
28	1	25.6	2	1	0	0	0	0	1	3	1		18	3	4	1	1		1	1	136	58		38	1	38.1429	1	2	1	1	146	34	30	1	45	8	53	1	0			1		1	0	1	0	300	0
24	4	19.5	1	0	0	0	4	0	0	0	1	1	3	2	0	0								40	0	40	1	2	1	1	168	19	20	2			36	2	0			1		1	1	1	0	600	2
31	5	31.2	1	0	0	0	1	0	1	3	1			5	3	1								39	0	39	1		1	1	155	51	50	1	38	4	42	1	0			1		1	0	1	0	800	2
27	6	21.1	1	0	0	0	4	0	0	0	1		0	1	2	0								37	4	37.5714	1	2	1	1	170	53	35	1	45	5	59	1	0			1		1	0	1	0	150	0
19	4	28.1	1	0	0	0	0	0	1	8	1	1	9	2	4	1	1		1	1	150	60		39	4	39.5714	1	1	1	1	139	40	30	1			45	1	0			1		1	0	1	0	100	0
32	1	29.4	3	0	0	0	0	0	0	0	1		9	4	2	0								40	2	40.2857	3	2	1	1	115	25	15	1			44	1	0			1		1	0	1	0	50	0
25	1	24.6	1	0	0	0	0	0	0	0	1		10	2	4	1	2		1	2	140	40		41	1	41.1429	1	1	1	1	140	35	40	1			61	1	3	3		1		1	1	0	0	200	0
32	1	21.5	1	0	0	0	0	0	0	0	1		0	3	3	1								37	4	37.5714	1	1	1	1	160	51	40	1			61	3	0			1		1	1	0	0	100	0
32	1	30	1	0	0	0	1	0	1	3	1	1	6	2	4	1	2		1	3	120	66		38	6	38.8571	1	1	1	1	175	52	40	1	30	20	50	1	0			1		1	1	1	0	100	0
29	4	22	1	0	0	0	0	0	0	0	1		0.5	0.5	0.75	0								40	0	40	2	1	1	2	156	44	50	1			36	2	0			1		1	1	1	0	750	1
34	1	21.1	1	0	0	0	0	0	0	0	1		2.5	2.5	4	1	1		1	1	140	51		40	2	40.2857	1	2	1	1	162	38	40	1		5		1	0			1		1	0	1	0	400	0
34	4	24.3	1	0	0	0	0	0	0	0	1	0	0	1	3	1	1	1	0					40	6	40.8571	1	3	1		138	55	4	1	7	10	17	2	0			1		1	1	0	0	100	0
35	4	19.3	1	0	0	0	4	0	1	11	1	1	6	7	4	1	1		1	2	131	56		38	4	38.5714	1	1	1	1	170	22	20	1	30	25	55	1	0			1		1	1	0	0	200	0
22	1	22.2	1	0	0	0	0	0	0	0	1	1	15	3.5	2.5	1			0					41	6	41.8571	1	2	1	1	177	33	30	1	30	19	49	3	0			1		1	0	1	0	500	1
32	1	21.4	1	0	0	0	4	0	1	11	1	1	8	2	4	1	1		1	1	135	54		38	1	38.1429	1	2	1	1	145	41	40	1	30	14	44	1	0			1		1	0	1	0	50	0
27	4	23.3	2	0	0	0	0	1	1	1	1	1	8	8	4	1	2		1	2	120	54		41	1	41.1429	1	1	1	1	162	27	40	1			30	1	0			1		1	0	1	0	400	0
21	4	27.3	1	0	0	0	3	0	1	4	1	1	9	5	3.25	1	2		1	2	135	51		41	1	41.1429	2	2	1	2	153	43	35	1			40	1	0			1		2	0	1	0	650	3
29	4	22	1	0	0	0	1	0	0	0	1		4	2	3.5	1	1		1	1	132	56		41	2	41.2857	1	2	1	1	158	45	30	1	30	11	41	1	0			1		1	0	1	0	100	0
33	4	27.7	2	0	0	0	0	0	0	0	1		1	9.5	3.5	1	1	0	1	1	138	73		40	0	40	1	2	1	1	166	41	40	1	30	18	48	1	0			1		1	1	0	0	100	0
25	4	21.5	1	0	0	0	0	0	1	1	1		5	3	2	0								41	2	41.2857	1	2	1	1	135	35	40	1			45	1	0			1		1	1	1	0	150	0
29	4	23.1	1	0	0	0	0	0	1	7	1		10	2	2	0								41	2	41.2857	1	2	1	1	131	47	60	3	27	9	36	1	0			1		1	1	1	0	150	0
27	4	24.7	1	0	0	0	0	0	0	0	1		1	2	4	1	1	1	1	1				41	1	41.1429	1	2	1	1		39	30	1	38	18	56	1	0			1		1	0	1	0	100	0
35	4	21.4	1	0	0	0	0	0	0	0	1		3	9	3.5	1	1							39	6	39.8571	1	2	1	1	164	43	40	1	20	8	28	1	0			1		1	0	1	0	300	0
26	4	22.3	2	0	0	0	0	1	1	6	1		3.5	4	2.5	1	1		1	1	144	60		40	6	40.8571	1	2	1	1	160	44	40	1		5		3	0			1		1	1	1	0	100	0
31	4	26.8	3	0	0	0	1	0	0	0	1				2	0								39	0	39	1	1	1	1	130	55	50	1			40	1	0			1		1	0	1	0	450	0
29	4	22.1	1	0	0	0	0	0	1	11	1		7	2	0.75	0								39	0	39	1	2	1	1	170	35	20	1	10	13	23	2	0			1		1	0	1	0	150	0
35	4	20.2	3	0	0	0	0	0	1	1	1	1	0	1	3.5	1	1	1	1		123	58	40	40	6	40.8571	1	1	1	1	123	58	40	1	30	10	40	1	0			1		1	1	0	0	500	0
40	4	21.2	2	0	0	0	0	0	0	0	1		1	3.25	3.25	1	2		1	2	114	65	60	40	2	40.2857	1	2	1	1	144	54	50	1			37	1	0			1		2	0	1	0	450	0
29	4	28.4	2	0	0	0	0	0	0	0	1		0	6	3.5	1	1	1	1	1	144	61		39	2	39.2857	1	2	1	1	168	44	40	1	30	9	39	1	0			1		1	0	1	0	300	0
33	4	21.2	1	0	0	0	0	0	0	0	1		2.5	2	2	0								38	5	38.7143	1	2	1	1	166	37	15	1			56	1	0			1		1	0	1	0	100	0
31	4	29	2	0	0	0	1	0	0	0	1		7	7	4	1			1	1	115	79		38	1	38.1429	1	2	1	1	148	59	40	1	40	10	50	1	0			1		1	1	0	2	150	0
41	4	23.7	3	1	0	0	1	0	0	0	1			7	3	1			0					41	0	41	2	2	1	2	147	43	40	1	20	13	33	2	0			1		1	0	0	0	100	0
31	4	24.6	1	0	0	0	0	0	0	0	1		1	1	3.5	1			0					40	5	40.7143	1	2	1	1	135	51	50	1	30	20	50	1	0			1		1	0	1	0	150	0
19	4	20	1	0	0	0	0	0	0	0	1		6	1.5	4	1			0					40	6	40.8571	1	3	1	1	131	28	20	1			40	1	0			1		2	1	1	0	350	0
26	4	34.1	1	0	0	0	0	0	0	0	1	0	4	3	2	0								40	4	40.5714	1	2	1	1	168	34	40	1	30	19	49	1	0			1		1	0	1	0	100	0
27	4	27.6	4	2	1	0	0	0	0	0	1	0	5	4	1.5	0								41	2	41.2857	2	1	1	2	148	58	40	1	30	6	36	3	0			1		1	0	1	0	250	0
32	5	26.7	1	0	0	0	0	0	1	2	1		3.5	2	0.25	0								41	0	41	1		1	1	130	70	50	1	30	5	35	2	0			1		1	1	1	0	200	0
39	4	22.2	1	0	0	0	1	0	0	0	1		0	4.5	4	1	3		1	3	165	50	60	38	6	38.8571	1	2	1	1	154	49	50	1			54	1	0			1		1	0	1	0	100	0
29	4	21.8	1	0	0	0	4	0	1	11	1	1	7	7	4	1	1		1	1	133	43		39	1	39.1429	1	2	1	1	143	22	30	1	30	5	35	3	0			1		2	0	1	0	900	2
27	4	23.2	1	0	0	0	0	1	0	0	1		4	2	3.5	1		1	0					38	3	38.4286	1	2	1	1	179	30	1	3	30	16	46	1	0			1		1	1	0	0	500	1
36	4	16.3	2	0	0	0	0	0	1	7	1				3.75	1								38	0	38	1	2	1	1		58	50	1				2	0			1		1	0	0	0	50	0
22	2	22.9	1	0	0	0	0	0	0	0	1		10	5	0.5	0								39	5	39.7143	1	2	1	1	165	27	30	1	8			2	0			1		1	0	1	0	150	0
29	4	24.1	1	0	0	0	0	0	0	0	1		3	7	4.5	1	1		1	3	119	64		39	2	39.2857	1	2	1	1	133	59	40	1	30	50	20	1	2	3		1		1	0	1	0	150	0
21	6	28.8	1	0	0	0	4	0	1	11	1	1	11.5	4	4.25	1	2		1	2	142	62	60	39	0	39	2	2	1	2	162	62	60	1			58	1	0			1		1	0	1	0	250	0
34	2	22.1	1	0	0	0	0	0	0	0	1		7	3.5	3.75	1	1		1	1	114	55		39	3	39.4286	1	2	1	1	152	38	40	1			28	1	0			1		1	0	1	0	100	0
28	1	26.8	1	0	0	0	0	1	1	6	1	1	11	5	4	1	1	1	1	1	144	48		38	3	38.4286	3	1	1		140	45	40	1			45	1	0			1		2	0	0	2	1100	2
36	1	24.2	1	0	0	0	0	0	0	0	1	1	4	1.5	4	1	1		1	1	130	50		41	3	41.4286	1	2	1	1	140	50	30	1			50	1	0			1		1	1	1	0	200	0
28	1	42.6	2	0	0	0	0	0	0	0	1	0	3	3	3.5	1	1		1	1	146	45	60	39	6	39.8571	1	2	1	1	146	35	35	1	30	11	41	1	0			1		1	0	1	0	300	0
37	1	19.1	3	1	1	0	0	0	0	0	1		0	0	2.5	1	1	1	0					40	5	40.7143	1	2	1	1	178	35	20	1	30	15	45	1	0			1		2	0	1	0	300	0
35	4	26.4	1	0	0	0	0	0	0	0	1		3.5	2	3	1	1		0					39	1	39.1429	1	2	1	1	176	51	25	1	30	13	43	3	0			1		1	0	1	0	400	0
28	2	21.5	1	0	0	0	0	0	0	0	1		1	2.5	3	1		1	0					39	2	39.2857	1	2	1	1	136	22	25	1	30	6	36	3	0			1		1	0	1	0	200	0
30	4	33.1	1	0	0	0	1	0	0	0	1		10	3	4	1	1	1	1	1	147	37		39	6	39.8571	1	2	1	1	170	67	60	1			27	1	0			1		1	0	1	0	200	0
34	4	21	2	0	0	0	0	0	0	0	1		5.5	3	2	0								40	4	40.5714	1	2	1	1	127	27	30	1	35	18	53	1	0			1		1	0	1	0	400	0
38	1	25.1	2	1	1	0	0	0	1	1	1	1	6	6	2	0								41	5	41.7143	3	2	1	3	143	22	30	1	20	30	50	3	0			1		1	0	2	2	500	1
30	1	30.1	1	0	0	0	1	0	0	0	1		3	4	2.5	1								40	5	40.7143	2	2	1	2	156	29	30	1			40	2	0			1		1	1	0	0	200	0
33	4	23.3	1	0	0	0	0	0	1	1	1	1	5	3	1.25	0								41	5	41.7143	1	2	1	1	175	28	20	1	30			1	0			1		1	0	1	0	300	0
28	1	27.6	1	0	0	0	0	0	1	9	1	1	12	2	2	0								41	0	41	1	2	1	1	110	50	40	1			74	1	0			1		1	1	1	0	300	0
18	4	20.3	4	0	0	0	0	0	0	0	1				4.25	1								39	5	39.7143	1	2	1	1	154	36	30	1			40	1	0			1		1	0	1	0	100	0
28	1	26	1	0	0	0	2	0	1	4	1		1	1.5	4.5	1								40	6	40.8571	1	2	1	1	158	36	30	1			25	3	0			1		1	0	1	0	200	0
29	1	28.8	1	0	0	0	1	0	0	0	1		3	9	3	1			0					40	3	40.4286	1	2	1	1	161	31	20	1	30	15	45	1	0			1		1	1	4	0	200	0
23	1	23.2	1	0	0	0	0	0	0	0	1		7	7	1.5	0								40	4	40.5714	1	2	1	3	137	41	20	1		10		2	0			1		1	0	1	0	150	0
29	5	28.9	1	0	0	0	0	0	0	0	1		4	1	0.5	0								40	5	40.7143	1	3	1	1	165	25	0	1				2	0			1		1	1	0	0	100	0
31	4	21.5	2	0	0	0	0	3	1	11	1	1	5	3	1	0								39	0	39	1	2	1	1	156	16	30	1		1		3	0			1		1	0	5	0	500	1
44	4	24.1	2	0	0	0	3	0	1	3	1	1	10	4	2.5	1	3		1		132	54		39	0	39	1	2	1	1	167	23	20	1	30	5	35	1	0			1		2	0	0	0	800	2
19	4	25	1	0	0	0	0	0	0	0	1		2	4	3.5	1	1	1	1	1	139	47		39	6	39.8571	1	2	1	1	160	47	40	1	29	11	40	1	0			1		1	1	0	3	200	0
31	1	28	1	0	0	0	0	0	1	2	1	1	3	2	3.5	1	1		1	1	123	56		40	2	40.2857	1	2	1	1	160	40	30	1	30	37	67	1	3	3		1		1	1	1	0	200	0
27	4	22	1	0	0	0	0	3	0	0	1		4	2	0.5	0								41	2	41.2857	1	2	1	1	118	35	50	1			20	2	0			1		2	0	1	0	150	0
28	4	21	1	0	0	0	0	0	0	0	1		7	1	1.5	0								40	3	40.4286	1	2	1	1	165	35	20	1	15	10	25	3	0			1		1	0	1	0	50	0
29	4	24.1	2	0	0	0	0	0	0	0	1		1	2	4	1			0					40	4	40.5714	1	2	1	1	136	57	40	1			30	1	0			1		1	0	1	0	50	0
27	4	20.7	2	0	0	0	0	0	0	0	1		6	2	2.5	1	1		1	1	138	56		38	6	38.8571	1	2	1	1	172	36	40	1			45	1	0			1		1	0	1	0	350	0
30	4	23.5	1	0	0	0	0	0	0	0	1		6	9	3.5	1	1		1	1	129	53		41	0	41	1	2	1	1	145	48	50	1		4		1	0			1		1	0	1	0	150	0
31	1	21.9	1	0	0	0	1	0	0	0	1		7	4	0.75	0								40	1	40.1429	1	2	1	1	155	46	40	1	10	5	15	2	0			1		1	0	1	0	100	0
28	2	21.5	2	0	0	0	1	0	0	0	1		1	1	2.75	1	1		0					40	1	40.1429	1	2	1	1	172	31	30	1	15	11	26	2	0			1		1	1	0	0	150	0
26	1	27.5	3	0	0	0	1	0	0	0	1	1	5	8	3	1	1	1	0					40	4	40.5714	1	1	1	1	140	35	30	3	50	8	58	1	0			1		1	1	0	0	150	0
38	1	22	1	0	0	0	0	0	0	0	1		12	6	2	0								40	5	40.7143	1	2	1	1	167	25	30	1			40	1	0			1		1	0	1	0	100	0
38	4	24.2	1	0	0	0	0	0	1	2	1	1	19	4	2.5	1	1	0	1	1	140	80		39	1	39.1429	1	2	1	1	140	65	70	1	20	10	30	3	0			1		1	0	1	0	150	0
30	4	18	2	1	1	0	0	0	0	0	1	0	2	1	1	0								39	0	39	1	2	1	1	147	36	25	1	13	11	24	3	0			1		1	0	1	0	300	0
32	4	29.3	2	1	0	0	0	0	1	8	1	1	12	1	3	1	1		1	1	126	78		40	3	40.4286	1	2	1	1	160	59	70	1	34	3	37	1	0			1		1	1	0	0	150	0
26	4	27	2	1	0	0	0	0	1	7	1	1			1.5	0								39	3	39.4286	2	2	1	2	140	58	50	1			40	1	0			1		1	1	0	0	300	0
29	1	21.9	2	0	0	0	0	0	1	1	1	1	15	6	4.5	1	1	1	1	1	124	53		41	6	41.8571	1	2	1	1	151	64	50	1	44	6	50	1	0			1		1	0	1	0	250	0
31	4	17.6	1	0	0	0	0	0	0	0	1		0	3	4.25	1	1	0	0					40	3	40.4286	1	2	1	1	150	39	40	1	17	5	22	2	0			1		1	0	1	0	50	0
33	4	20.8	1	0	0	0	0	0	1	2	1	1		2	2	0								38	3	38.4286		2	1	3	170	47	50	1				2	0			1		1	1	0	0	50	0
32	4	22.9	1	0	0	0	0	0	0	0	1	0	2	5	0.25	0								40	6	40.8571	1	2	1	1	140	40	40	1	30	22	52	1	0			1		1	0	1	0	300	0
41	4	34.2	1	0	0	0	1	0	0	0	1		2	2	5	1	2		1	2	140	55	70	40	2	40.2857	3	2	1	3	150	63	20	1	30	10	40	1	0			1		1	0	1	0	50	0
29	4	18.8	5	1	0	0	0	0	0	0	1	1	2	2	2	0								39	0	39	1	3	1	1	140	18	10	1	22	17	39	1	0			1		2	0	1	0	200	0
27	4	22.9	1	0	0	0	0	0	0	0	1		2	7	3	1			1	1	150	48		38	5	38.7143	1		1	1	162	32	30	1		4		1	0			1		1	0	1	0	150	0
26	1	28.7	1	0	0	0	0	0	1	1	1	1	3	3	2	0								41	4	41.5714	1	1	1	1	175	35	30	3	20	5	25	3	0			1		2	1	0	0	750	2
30	4	23.1	1	0	0	0	0	0	0	0	1	1	4	3	3	1	1		1	1	135	45	50	40	4	40.5714	1	2	1	1	145	30	20	1			50	1	0			1		1	0	1	0	150	0
30	4	21	1	0	0	0	0	0	1	2	1	1	5	4	4.25	1			0					37	1	37.1429	2	2	1	2	160	38	30	1			59	1	0			1		1	1	1	0	150	0
28	4	28.1	1	0	0	0	0	0	0	0	1		5	5	2	0								39	0	39	1	3	1	1	170	17	20	1	75	6	81	1	0			1		1	0	1	0	800	2
29	4	19.9	1	0	0	0	0	0	0	0	1		1	3	3	1	1		0					40	4	40.5714	1	2	1	1	152	19	20	1	30	21	51	1	0			1		1	0	1	0	200	0
28	4	23	1	0	0	0	0	0	0	0	1		4.75	0.75	3.5	1	1	1	0					39	4	39.5714	1	2	1	1	157	37	40	1	30	10	40	1	0			1		1	0	1	0	150	0
26	1	29.7	1	0	0	0	0	0	1	2	1	1	9	1	4.75	1	1		0					38	6	38.8571	1	2	1	1	155	44	40	1	30	10	40	1	0			1		1	1	1	0	150	0
31	1	16.8	1	0	0	0	0	0	1	7	1	1	2	5	4	1								40	2	40.2857	1	2	1	1	150	40	30	1		10		3	0			1		1	0	1	0	50	0
30	4	21.5	1	0	0	0	0	0	0	0	1		1.5	2.5	4.5	1	1		1	1	120	44	55	40	4	40.5714	1	2	1	1	158	36	20	1	30	5	35	1	0			1		1	0	1	0	50	0
26	4	20.5	1	0	0	0	0	0	1	11	1	1	15		1.5	0								38	5	38.7143	1	3	1	1	156	40	45	1	30	10	40	1	0			1		1	0	1	0	50	0
24	2	20.4	2	1	0	0	0	2	0	0	1		1	2	2.5	1	1	0	0					38	2	38.2857	1	2	1	1	153	43	50	1	10	10	20	3	0			1		1	0	1	0	50	0
28	1	22.7	1	0	0	0	1	0	0	0	1		11	5		1	2	0	1	2	144	72		40	3	40.4286	2	1	1	2	150	55	50	1	30	20	50	1	0			1		1	1	0	0	150	0
27	1	28.9	1	0	0	0	4	0	0	0	0		1	7	3	1	2		1	2	130	30	40	38	1	38.1429	2	2	1	2	130	30	30	1		11		3	0			1		1	0	1	0	550	1
23	2	23.1	1	0	0	0	0	0	0	0	1		5	7.25	1.75	0								40	1	40.1429	1	2	1	1	160	50	40	1	40	10	50	1	0			1		1	1	1	0	300	0
45	4	23.8	1	0	0	0	0	0	0	0	1		2	1	3.5	1			0					40	0	40	1	2	1	1		49	30	1	20			1	0			1		1	0	1	0	50	0
31	1	33.6	1	0	0	0	1	1	1	3	1	1	8	4	4	1	1		0					38	4	38.5714	1	2	1	1	158	25	20	1	36	14	50	1	0			1		1	0	1	0	100	0
23	1	25.5	2	1	0	0	0	0	0	0	1		3	1	0.5	0								38	1	38.1429	3	2	1	3	125	75	60	1				2	0			1		1	0	0	1	50	0
32	1	29.4	2	0	0	0	1	1	1	3	1	1	5	6	4	1	2		1	2	130	68	50	38	1	38.1429	2	2	1	2	135	64	40	1			42	1	0			1		1	0	1	0	400	0
32	4	26.6	3	1	0	0	0	1	1	6	1		7	1	2.75	1	1	1	0					38	1	38.1429	1	2	1	1	150	53	60	1	20	20	40	1	0			1		1	0	1	0	50	0
29	4	22.9	1	0	0	0	0	0	0	0	1		8		1.5	0								39	0	39	2	2	1	2	148	59	60	2	21	6	27	2	0			1		1	1	1	0	150	0
26	4	18.3	1	0	0	0	0	0	0	0	1		2	3	4	1	1	2	0					39	0	39	1	2	1	1	160	38	20	1	20	11	31	1	0			1		1	0	1	0	50	0
26	4	25.7	1	0	0	0	0	0	0	0	1			2	0.5	0								40	0	40	1	2	1	1	144	51	50	1	30	5	35	1	0			1		1	1	1	0	200	0
36	4	22.4	2	0	0	0	0	0	1	4	1	1	1	5	4.25	1	1		1	1	118	60		41	0	41	2	2	1	2	128	70	70	1	26	5	31	1	0			1		1	0	1	0	100	0
28	4	21.1	1	0	0	0	0	0	0	0	0		5	4	1.5	0								41	0	41	1	2	1	1	168	26	20	1	30	15	45	1	1	3	0	1		1	0	1	0	150	0
26	4	35.5	2	0	0	0	1	0	1	3	1	1	1	5.5	3	1	1		1	1	161	70	50	39	1	39.1429	1	2	1	1	175	25	20	1			17	2	0			1		1	0	1	0	50	0
30	4	21.3	1	0	0	0	0	0	0	0	1		1.5	2	0.5	0								40	2	40.2857	2	2	1	2	150	30	30	1		5		3	0			1		1	0	1	0	50	0
22	4	24.8	2	0	0	0	1	0	0	0	1		2	2.5	3.5	1			0					40	4	40.5714	1	2	1	1	115	62	60	1	15	25	40	3	0			1		1	0	1	0	50	0
32	4	25.7	3	0	0	0	0	0	0	0	1		7	10.5	2.75	1	1	1	0					41	0	41	1	2	1	1	153	43	50	1	30	19	49	1	0			1		1	1	0	0	100	0
28	1	22.1	1	0	0	0	0	0	0	0	1		2	4	3	1	1		1	1	154	60	60	40	0	40	1	2	1	1	167	44	50	1			40	1	0			1		1	0	1	0	150	0
30	4	21	1	0	0	0	0	0	0	0	1		3.5	3.5	4.5	1			0					41	3	41.4286	1	1	1	1	154	60	60	1			42	1	0			1		1	0	1	0	250	0
38	1	22	1	0	0	0	1	0	0	0	1	1	6	3	1	0								37	3	37.4286	1	2	1	1		45	40	1	25	5	30	2	0			1		1	1	1	0	350	0
33	4	25.1	1	0	0	0	0	0	0	0	1		1	1	4	1	2	1	1	2	146	38		40	0	40	2	2	1	2	170	40	30	1	30	5	35	2	0			1		1	1	0	0	400	0
23	4	28	1	0	0	0	1	0	0	0	1		7	5.5	4	1	2	1	1	2	139	59		40	2	40.2857	2	2	1	2	145	58	60	1	30	12	42	3	0			1		1	1	0	0	50	0
29	4	29.1	1	0	0	0	2	0	1	4	1	1	8	7	3.5	1	1	0	1	1	141	60		37	5	37.7143	1	3	1	1	177	29	30	1	30	15	45	1	0			1		1	1	1	0	300	0
25	4	18.8	1	0	0	0	0	0	0	0	1		2	5	3.5	1	1		1	1	128	53	50	38	5	38.7143	1	1	1	1	145	45	50	1		6		1	0			1		1	1	0	0	150	0
29	1	27	1	0	0	0	1	0	1	3	1		6	5	5	1	1	1	1	1	124	48	40	39	1	39.1429	1	1	1	1	139	30	30	3	30	30	60	1	0			1		1	1	1	0	250	0
21	4	19.1	1	0	0	0	0	0	0	0	1		3	3	2.5	1	3		1	1	170	30	20	39	6	39.8571	1	2	1	1	170	30	20	1	35	10	45	1	0			1		1	0	2	0	100	0
28	4	33.8	3	0	0	0	0	1	1	6	1		4	4	3.5	1			0					38	4	38.5714	1		1	1	139	60	60	1		12		1	0			1		1	0	1	0	100	0
35	4	21.5	1	0	0	0	0	0	0	0	1		2	1	3.5	1	1	1	1	1	155	50		38	4	38.5714	1	2	1	1	162	45	50	1	30	30	60	1	0			1		1	0	1	0	20	0
23	1	19.7	2	0	0	0	0	0	0	0	1		3	5	4.5	1	3		1	3	138	38	45	39	4	39.5714	1	3	1	1		12	3	1			39	1	0			1		1	0	1	0	150	0
29	1	18.6	1	0	0	0	0	0	0	0	1		1	4	3.5	1	3	1	0					38	3	38.4286	3	2	1	1	152	35	20	3	40	9	49	1	0			1		1	1	3	0	100	0
26	4	18.9	2	0	0	0	4	2	1	11	1		1	4	3	1			0					38	6	38.8571	1	2	1	1	165	33	30	2			60	3	0			1		1	1	0	0	650	2
33	4	24.9	1	0	0	0	0	0	0	0	1		1.5	2	2.5	1		1	0					40	2	40.2857	2	2	1	2	173	44	40	1	20	22	42	1	0			1		1	0	1	0	100	0
34	1	26	4	1	0	0	0	0	0	0	1		0	1	2	0								41	1	41.1429	1	1	1	2	161	50	60	1			35	1	0			1		1	0	1	0	50	0
31	1	22.7	1	0	0	0	0	1	1	11	1	1	6	4	4	1	3	0	1	1	120	58		40	3	40.4286	3	2	1	1	160	37	30	1	25	13	38	1	0			1		1	1	1	0	150	0
36	4	27.3	2	0	0	0	0	0	1	1	1	0	6	3	0.75	0								41	2	41.2857	1	2	1	1	132	55	40	1		5		1	0			1		1	0	1	0	100	0
29	1	20	1	0	0	0	0	0	0	0	1	0	1.5	4	2	0								39	6	39.8571	1	2	1	1	136	50	50	1	10	9	19	2	0			1		1	0	1	0	200	0
33	1	29	1	0	0	0	0	0	1	2	1	1	2	1	1	0								40	1	40.1429	1	3	1	1	154	30	35	1			40	3	0			1		1	1	1	0	400	0
20	4	20.7	2	1	0	0	0	1	0	0	1	0	1	2.5	2	0								40	5	40.7143	1	2	1	1	138	53	50	3	30	20	50	1	0			1		1	0	0	0	60	0
22	1	24.6	1	0	0	0	0	0	0	0	1	1	2.5	2	3.5	1	1		1	1	136	50		39	4	39.5714	1	2	1	1	145	40	30	1		3		1	0			1		1	0	1	0	100	0
38	4	32	2	1	1	0	1	0	1	1	1	1	1.5	1	3	1			0					38	5	38.7143	1	2	1	1		60	45	1	30	5	35	3	2	1	0	1		1	0	1	0	150	0
24		31.9	3	0	0	0	1	0	1	7	1	1	6	7	3	1	1	0	1	1	160	65	70	40	6	40.8571	1	2	1	1	176	46	50	1			60	1	3	3		1		1	1	1	0	500	1
26	1	26.8	1	0	0	0	0	0	1	1	1	1	2	4	5	1	1		1	3	135	68	60	41	5	41.7143	1	2	1	1	156	57	50	3	20	20	40	1	0			1		1	0	1	0	400	0
32	4	26	1	0	0	0	1	0	0	0	1	1	1	6	3.5	1	1	1	1	1	144	57	50	38	3	38.4286	1	2	1	1	161	42	40	1	30	9	39	1	0			1		1	0	1	0	150	0
29	1	25.4	1	0	0	0	0	0	0	0	1	0	2	2	2	0								40	3	40.4286	1	3	1	1	144	23	20	1	30	15	45	1	0			1		1	1	1	0	150	0
43	4	21.7	3	0	0	0	0	0	1	1	1	1	4	5	3	1	1	1	1	1	143	65	60	41	1	41.1429	1	2	1	1	163	40	40	1		16		3	0			1		1	0	1	0	200	0
30	2	21.9	2	0	0	0	0	0	0	0	1	1	5.5	3.5	4	1	1		1	1	136			39	4	39.5714	1	2	1	1	167	27	30	1	30	11	41	1	0			1		1	0	1	0	50	0
35	4	19.8	3	1	0	0	0	0	1	1	1	0	7	0.5	2.5	1	3	1	1	3	140	50		41	5	41.7143	3	2	1	3	140	55	65	1		10		1	0			1		1	1	2	0	100	0
25	4	27.6	1	0	0	0	0	0	0	0	0													40	1	40.1429	1	2	1	1	157	35	30	1				1	0			1		1	0	0	0	100	0
25	1	22.9	2	0	0	0	0	0	1	9	0	0		1	1	0								41	1	41.1429	1	2	1	1	138	19	5	1	45	5	50	1	0			1		1	1	0	0	550	1
28	4	20.1	1	0	0	0	1	0	0	0	1	0	2	5	3	1			0					39	5	39.7143	1	2	1	1	123	52	50	1			20	2	0			1		1	1	0	0	50	0
34	4	20.3	1	0	0	0	0	0	0	0	1	1	9.5	3.25	4.25	1	1	0	1	1	140	57	50	40	6	40.8571	1	2	1	1	161	33	30	1			42	1	0			1		1	0	1	0	100	0
26	1	18.3	1	0	0	0	0	0	0	0	1	0	2	1.5	3.5	1	1	2	1	1	154	36	30	38	4	38.5714	1	3	1	1	172	17	15	1			46	1	0			1		1	0	1	0	300	0
30	1	27.4	3	2	0	0	0	0	0	0	1	1	7	7.5	3	1			0					40	0	40	1	2	1	1	147	54	40	1	30	5	35	1	0			1		1	0	1	0	250	0
23	4	20.6	1	0	0	0	0	0	0	0	1	1	2	8.5	3.5	1	1	0	1	1	150	60		39	5	39.7143	1	2	1	1	155	50	40	1		10		1	0			1		1	1	0	0	100	0
33	4	19.8	2	1	0	0	0	0	0	0	1	0	1	3	1.5	0								40	3	40.4286	1	2	1	1	142	56	50	1	30	6	36	1	0			1		1	1	0	0	250	0
31	1	27.1	1	0	0	0	0	0	0	0	1	1		1.5	3.5	1			0					39	2	39.2857	1	2	1	1	152	49	50	1			56	1	0			1		1	0	1	0	100	0
25	2	24.1	2	0	0	0	0	0	0	0	1	1	4	5	3.5	1	1	1	1	1	150	48	50	40	6	40.8571	1	2	1	1	170	25	20	1	30	12	42	1	0			1		1	0	1	0	200	0
27	4	20.5	1	0	0	0	0	0	0	0	1	1	1	3	4	1	1	0	1	1	135	58		40	5	40.7143	1	2	1	1	148	54	45	1			30	3	0			1		1	0	1	0	100	0
35	4	24	1	0	0	0	1	0	1	2	1	0	2	1.5	0.75	0								39	3	39.4286	1	2	1	1	150	28	25	1			15	3	0			1		1	1	0	0	50	0
24	4	21.4	2	0	0	0	0	0	1	1	1	1	3	4	4	1			0					41	3	41.4286	2	2	1	2	140	50	40	1			25	3	0			1		2	0	1	0	650	2
29	4	18.9	1	0	0	0	0	0	0	0	1	0	3	1	2	0								40	5	40.7143	2	2	1	2	140	40	40	1	39	16	46	1	0			1		2	1	1	0	1000	2
29	4	21.9	1	0	0	0	0	0	0	0	1	1	12	6	4.75	1	1	1	1	1	140	60		41	2	41.2857	1	2	1	1	150	30	30	1			45	1	0			1		1	0	1	0	250	0
25	4	19.9	1	0	0	0	0	1	1	3	1	1	13	2	5.25	1	2	0	0					38	4	38.5714	2	0	1	2	120	77	70	0	35	0	35					2	3	1	0	0		300	0
30	4	21	2	0	0	0	0	0	0	0	1	1			3.5	1		0	0					40	5	40.7143	1	1	1	1	143	45	50	1	30	5	35	1	2	1		2	7	1	0	0		300	0
27	4	23	2	0	0	0	0	0	0	0	1	0	11	8	2	0								40	6	40.8571	2	0	1	2	124	60	60	0	30	0	30					2	3	1	0	0		150	0
33	4	27.3	1	0	0	0	3	1	1	6	3	1	11	2	3	1	1	0	1	1	112	40	50	38	2	38.2857	1	0	1	1	112	40	50	0	0	0	0					2	3	1	0	0		300	0
35	3	24.8	2	0	0	0	0	0	0	0	4	1	11	4.5	5	1	2	0	1	2	166	51	50	40	6	40.8571	2	0	1	2	140	60	50	0	0	0	0					2	3	3	0	0		250	0
33	1	24.1	1	0	0	0	0	1	1	2	1	1	0	11	3.5	1	1	0	1	1	127	73		41	2	41.2857	3	0	1	3	143	73	80	0	30	0	0					2	3	3	0	1		250	0
28	4	21.8	1	0	0	0	1	0	0	0	1	1			3.75	1	3	0	1	3	128	74		39	1	39.1429	1	0	1	1	150	60	60	1	20	5	25	1	0			2	6	1	0	0		200	0
36	1	21.5	1	0	0	0	0	1	0	0	4	1	3	11	4.75	1	1	0	1	1	118	85		40	5	40.7143	1	0	1		122	79	75	0	15	0	15					2	3	1	0	0			0
33	4	24.3	1	0	0	0	1	0	0	0	1	1	2	1.5	3.5	1	1	0	1	1	133	61		37	4	37.5714	1	1	1	1	139	61	60	1	30	5	35	1	0			2	6	3	0	1		200	0
34	1	25.6	1	0	0	0	0	0	1	2	1	1	10	6	2	0								41	4	41.5714	3	0	1	3	110	60	70	0	30	0	30					2	3	1	0	0			0
32	1	29.4	1	0	0	0	1	1	1	6	1	1	9	8	2	0								38	4	38.5714	2	0	1	2	104	80	80	0	0	0	0					2	3	1	0	1		250	0
36	1	21.8	1	0	0	0	0	0	0	0	1	1	3	12	3.5	1			0					40	4	40.5714	3	1	1	3	130	50	40	1	25	5	30	1	3	1		2	6	1	0	0		100	0
30	4	27.4	1	0	0	0	1	0	1	1	1	1	7	7	4	1	1		1		143	50	40	41	0	41	1		1		143	50	40	1	30			1	2	1		2	6	3	0	0		300	0
32	1	23.3	3	2	0	0	3	0	1	3	1	0	4	0.5	1	0								39	1	39.1429	1	2	1	1	138	31	50	1	30	0	30	1	0			1		1	0	2		50	0
28	4	22.5	1	0	0	0	0	0	0	0	1	0	11	4	1.5	0								40	0	40	1	2	1	1	140	35	35	1	45	0	45	1	0			1		1	1	1		50	0
21	6	33.7	2	0	0	0	0	0	0	0	1	0	4	3	2	0								40	5	40.7143	1	2	1	1	155	28	30	1	45	0	45	3	0			1		1	1	1		100	0
32	4	23	1	0	0	0	0	1	1	6	1	1	6.5	6	3.5	1								38	3	38.4286	2	1	1	2	122	59	65	1	13	0	13	1	0			1		1	1	0		300	0
37	4	29.7	1	0	0	0	0	0	1	1	1	0	10	3	2	0								42	0	42	1	2	1	1	145	30	30	1	20	0	20	2	0			1		1	1	0		200	0
29	1	25.5	3	0	0	0	0	0	0	0	1	1	4	3	3.5	1	1	1	1	1	133	32		41	1	41.1429	1	2	1	1	140	25	25	1	45	0	45	1	0			1		1	0	1		400	0
29	4	27.9	2	0	0	0	2	0	1	10	1	1	4	2	3.5	1	2	0	1	2	129	65		38	4	38.5714	2	2	1	2	150	58	45	1	6	0	6	1	0			1		1	0	1		150	0
32	4	21.8	1	0	0	0	4	0	1	11	1	0	5.5	3	2	0								39	1	39.1429	1	2	1	1	178	41	30	1	31	0	31	3	0			1		2	0	1		50	0
37	4	19.6	1	0	0	0	0	0	0	0	1					0								39	0	39	1	2	1	1	160	28	20	1	30	0	30	1	0			1		1	0	1		50	0
25	4	26.8	1	0	0	0	1	0	0	0	1	1	12	7	4.25	1	1	2	1	1	115	30		41	1	41.1429	1	2	1	1	133	57	30	1	22	0	22	1	0			1		1	1	0		150	0
31	4	19.8	2	0	0	0	1	0	1	3	1	0	4	2.5	0.5	0								40	2	40.2857	1	3	1	1	155	29	30	1	50	0	50	1	0			1		1	1	0		250	0
25	4	31.8	1	0	0	0	0	0	1	10	1	0	5	1	0.25	0								39	5	39.7143	1	2	1	1	149	38	30	1	23	0	23	2	0			1		1	0	0		50	0
38	4	20.9	2	0	0	0	4	0	1	2	1	1	2	2	3.5	1								38	0	38	1	1	1	1	151	52	60	1	50	0	50	1	0			1		1	1	1		250	0
35	4	18.4	2	1	0	0	1	0	0	0	1	0	2.5	1	0.25	0								40	2	40.2857	1	1	1	1	148	48	50	1	20	0	20	2	0			1		1	0	1		100	0
26	1	24.4	1	0	0	0	4	0	1	7	1	1	8	1.5	3.5	1	2	0	1	2	150	68	60	39	0	39	2	2	1	2	160	45	40	1	12	0	12	3	0			1		1	0	1		50	0
29	4	26.6	1	0	0	0	0	0	1	1	1	1	18	4	5	1	2	0	1	2	134	71	70	41	4	41.5714	2	0	1	2	136	69	70	0	0	0	0					2	3	1	0	0		200	0
30	4	21.8	5	3	0	0	0	0	1	8	1	0	4	1	2	0								40	0	40	1	2	1	1	122	54	50	1	35	0	35	1	0			1		1	0	1		30	0
37	4	23.9	1	0	0	0	0	0	0	0	1	1	5	3	3.45	1	2	1	1	2	136	43		38	5	38.7143	2	3	1	2	143	36	35	1	35	0	35	3	0			1		1	0	1		30	0
30	4	21.5	3	0	0	0	4	0	0	0	1	0	5	3	2	0								40	2	40.2857	1	2	1	1	145	45	50	1	25	4	29	2	0			1		1	0	1		50	0
34	4	26.7	2	1	0	0	4	0	0	0	1	0	0	1	0.5	0								39	5	39.7143	1	2	1	1	170	25	20	1	20	0	20	3	0			1		1	0	1		50	0
31	1	22.6	2	0	0	0	0	0	1	1	1	0	8	0.25	2	0								41	6	41.8571	1	1	1	1	140	51	50	1	20	6	26	2	0			1		1	1	1		100	0
33	1	23.5	2	0	0	0	1	0	1	1	1	1	11	2.5	4	1	1	1	1	1	127	67	70	41	4	41.5714	1	2	1	1	140	40	40	1	25	0	25	1	2	3		1		1	0	1		200	0
36	1	28.7	5	2	0	0	0	0	0	0	1	0	1	2	2	0								41	2	41.2857	1	1	1	1	145	52	50	1	55	0	5	1	0			1		1	0	0		50	0
26	4	24.6	2	0	0	0	4	2	1	5	1	1	10	2	4.4	1	1	0	1	1	139	70	70	38	1	38.1429	1	2	1	1	145	46	45	1	40	3	43	1	0			1		1	0	1		200	0
32	1	18.9	1	0	0	0	0	0	0	0	1	1	0	6	4	1	1	1	1	1	123	59	55	40	2	40.2857	1	2	1	1	128	29	45	1	23	0	23	2	0			1		1	0	1		250	0
38	4	26.2	1	0	0	0	0	3	0	0	1	0	5	2	2	1	1	1	1	1	115	55	55	39	2	39.2857	2	2	1	2	135	45	45	1	30	5	35	3	0			1		1	1	0		150	0
35	4	24.6	2	1	0	0	1	0	1	8	1	0	8	2.5	2	0								39	3	39.4286	1	2	1	1	159	49	50	1	50	0	50	1	0			1		1	0	1		150	0
28	4	19.1	3	2	1	0	1	0	0	0	1	1	4	4	3.5	1	2	1	1	2	115	53	55	40	5	40.7143	1	1	1	1	162	25	25	1	30	5	35	1	0			1		1	0	1		500	0
29	2	35.7	2	1	1	0	0	0	0	0	1	0	6	1.5	1.35	0								39	5	39.7143	1	2	1	1	159	34	30	1	30	5	35	1	0			1		1	0	1		25	0
27	4	22.8	2	0	0	0	0	0	0	0	1	1	2	2.75	4	1	1	1	1	1	143	44	60	40	3	40.4286	1	2	1	1	149	48	40	1	30	12	42	1	0			1		1	0	1		150	0
32	4	27.7	1	0	0	0	1	0	1	3	1	0	3.5	2.5	2.25	1	1	2	1	1	135	35	40	39	0	39	1	2	1	1	138	32	35	1	30	15	45	1	2	1		1		1	1	0		100	0
42	4	19.9	5	4	0	0	0	0	0	0	1	0	0.5	1.5	2.5	1								40	1	40.1429	2	1	1	2	155	45	45	1	20	4	24	2	0			1		1	0	0		100	0
34	1	27.2	3	1	0	0	4	0	0	0	1	1	3.5	2.75	3	1								38	4	38.5714	1	2	1	1	153	37	35	1	30	5	35	1	0			1		1	0	1		50	0
31	4	31.2	1	0	0	0	0	0	0	0	1	0	3.5	2	2.5	1								40	1	40.1429	1	2	1	1	132	35	35	1	30	5	35	1	0			1		1	0	1		300	0
30	4	21.6	1	0	0	0	4	0	0	0	1	1	2.5	2	4	1	1	1	1	1	143			38	4	38.5714	1	2	1	1	155	35	35	1	30	5	35	1	0			1		1	0	2		400	0
30	1	20.5	3	0	0	0	0	0	1	1	1	1	6	6	3.5	1	1	1	1	1			45	40	5	40.7143	1	1	1	1	140	45	45	1	20	6	26	2	0			1		1	0	2		350	0
29	4	27.7	1	0	0	0	0	0	0	0	1	1	6	5.25	2.75	1								41	2	41.2857	1	2	1	1	150	66	60	1	15	6	21	2	0			1		1	1	0		60	0
27	5	23.6	1	0	0	0	0	0	0	0	1	0	5.5	3.5	2.5	1	1	1	1	1	132			38	6	38.8571	1	2	1	1	161	35	35	1	17	10	27	1	0			1		1	1	2		250	0
31	4	21.6	1	0	0	0	4	0	0	0	1	1	2	2	4	1								40	1	40.1429	1	2	1	1	120	60	60	1	30	28	58	1	0			1		1	0	1		400	0
30	2	19.1	2	1	0	0	4	0	0	0	1	0	0	2	0.25	0								41	1	41.1429	1	2	1	1	150	45	45	1	40	7	47	1	0			1		1	1	0		150	0
35	4	33.7	3	1	1	0	4	0	0	0	1	1	4	4	3	1								39	0	39	1	2	1	1		25	25	1	30	5	35	1	0			1		1	0	1		1200	1
32	4	19.7	2	0	0	0	0	0	0	0	1	1	7	8	3.5	1	1	0	1	1	121	81	80	40	2	40.2857	1	1	1	1		50	50	3	0	10	10	2	0			1		1	0	1		100	0
23	4	22.2	1	0	0	0	1	0	1	11	1	0	3.5	1	3.75	1	1	1	1	1	150	40	40	38	2	38.2857	1	3	1	1	170	17	20	1	30	15	45	1	0			1		1	0	1		50	0
31	4	30.4	1	0	0	0	3	0	1	4	1	0	13	7	2	0								41	1	41.1429	1	1	1	1	158	47	50	1	30	20	50	1	0			1		1	0	1		100	0
25	4	26.9	2	1	1	0	4	0	0	0	1	0	1	4	2	0								39	2	39.2857	1	2	1	1	160	28	30	1	20	10	30	1	0			1		1	0	1		300	0
23	1	24.3	1	0	0	0	0	0	1	1	1	0	11	1.5	2.5	1	1	1	1	1	140	49	50	41	1	41.1429	1	3	1	1	165	10	10	1	30	18	48	1	0			1		2	0	1		600	2
40	4	24.4	3	2	0	0	0	0	1	1	1	1	6	2	3	1	2	1	1	2	122	55	50	41	4	41.5714	2	1	1	2	125	50	50	1	30	5	35	1	0			1		1	0	1		150	0
22	2	18.8	1	0	0	0	4	0	0	0	1	1	6	3	3	1								41	4	41.5714	1	2	1	1	128	35	35	1	30	10	40	1	0			1		1	1	0		500	2
29	1	23.9	1	0	0	0	4	3	1	7	1					1	2	1	1	2	122	60	60	40	4	40.5714	2	1	1	2	125	54	55	1	30	5	35	3	0			1		1	0	1		50	0
33	4	17.4	2	1	0	0	0	0	0	0	1	1	3	2	3.5	1	2	1	1	2	130	64	60	40	5	40.7143	2	1	1	2	135	55	55	1	30	20	40	1	0			1		1	1	0		100	0
34	4	21.8	2	0	0	0	0	0	0	0	1	1	3	3	3	1								39	1	39.1429	1	3	1	1	155	25	25	1	20	5	25	1	0			1		1	0	1		50	0
28	4	22.5	1	0	0	0	1	0	0	0	1	0	1.5	1.25	0.15	0								37	5	37.7143	1	2	1	1	142	40	35	1	10	5	15	2	0			1		1	0	1		150	0
34	1	26.6	2	1	0	0	3	4	1	4	0	1	4	1	0.5	0								38	3	38.4286	1	2	1	1	150	38	40	1	10	7	17	3	0			1		1	0	1		100	0
24	4	23.8	1	0	0	0	0	0	0	0	1	0	0.5	2.1	2.5	1								38	3	38.4286	1	2	1	1	143	38	40	1	40	2	42	1	0			1		1	0	2		50	0
27	4	22.5	1	0	0	0	2	0	0	0	1	0	2	2	2.75	1	1	0	1	1	121	54	55	40	2	40.2857	1	1	1	1	151	50	50	3	30	21	51	1	0			1		1	1	0		100	0
28	4	22.3	1	0	0	0	0	0	0	0	1	1	3	6	5	1	1	0	1	1	120			40	5	40.7143	1	1	1	1	131	60	60	1	20	28	48	1	0			1		1	0	1		200	0
33	1	23.7	1	0	0	0	1	0	1	7	1	1	8	3	4	1								41	0	41	1	1	1	1	123	60	60	1	10	20	30	1	0			1		1	1	1		250	0
28	4	37.6	1	0	0	0	1	0	1	2	1	1	9	7	3.5	1								37	2	37.2857	2	2	1	2	135	37	40	1	30	5	35	1	0			1		2	1	1		200	0
33	1	20.2	4	3	0	0	4	0	1	7	1	0	4	1	2.5	1								41	1	41.1429	2	2	1	2	137	35	35	1	25	5	30	1	0			1		1	0	1		250	0
24	4	38.1	2	0	0	0	0	0	0	0	1	1	4	2	3.5	1	1	1	1	1	140	45	50	40	4	40.5714	1	2	1	1		35	35	1	30	8	38	1	0			1		1	1	0		300	0
29	1	15.9	2	1	0	0	0	0	1	7	1	1	4	2	4	1								41	1	41.1429	1	2	1	1	135	50	50	1	30	5	35	1	0			1		1	0	1		100	0
27	4	19.5	1	0	0	0	0	0	0	0	1	0	5	3	2	0								39	1	39.1429	1	2	1	1	139	30	30	1	30	7	37	3	0			1		1	0	1		250	0
26	5	24.7	1	0	0	0	4	0	1	2	1	1	9	7	4.5	1	1	1	1	1	125	55	50	40	0	40	1	1	1	1	136	44	45	1	30	30	60	1	3	1		1		1	1	1		550	2
35	1	24.6	1	0	0	0	1	0	0	0	1	0	6	6	4	1	2	1	1	2	133	50	50	40	4	40.5714	1	2	1	1	155	36	40	1	27	3	30	2	0			1		1	0	1		400	0
31	4	20.1	2	0	0	0	2	0	1	4	1	1	10	2	4	1	2	0	1	2	127	63	65	38	2	38.2857	1	2	1	1	159	40	40	1	30	12	42	1	0			1		1	0	1		350	0
28	4	23.8	1	0	0	0	0	0	0	0	1	0	6	5	4.5	1	1	0	1	1	128	55	55	39	0	39	1	3	1	1	135	33	35	1	30	7	37	1	0			1		1	0	1		750	2
33	4	24.5	1	0	0	0	1	0	0	0	1	0	10	1	2.5	1	1	1	1	1	140	35	35	39	2	39.2857	1	2	1	1	149	24	25	1	20	5	25	3	0			1		1	0	1		150	0
31	2	26.3	2	1	1	0	1	0	0	0	1	1			0.5	0								40	1	40.1429	1	0	1	1	135	50	50	0	0	0	0					2	4	1	0	0		150	0
24	4	18.9	2	0	0	0	0	3	0	0	1	1	5	4	4	1	1	0	1	1	127	50	50	41	0	41	1	2	1	1	135	45	45	1	30	5	35	1	0			1		1	0	2		700	1
25	4	20.4	4	0	0	0	0	0	1	1	1	1	4.5	2	4	1	2	1	1	2	117	59		41	1	41.1429	3	1	1	3	147	47	45	1	55	5	60	3	2	1		1		1	1	1		200	0
27	4	28.8	1	0	0	0	0	0	1	1	1	1	12.5	10	4	1	2	1	1	2	128	57	50	42	0	42	3	2	1	3	148	37	30	1	30	10	40	1	0			1		1	1	1		350	0
36	4	19.5	1	0	0	0	0	0	1	2	1	1	7	2	3	1	3	1	1	3	106	50		41	3	41.4286	1	1	1	1	144	38	40	1	25	5	30	1	0			1		1	1	1		300	0
20	4	19.1	7	1	0	0	4	2	1	5	1	0	3	1.5	0.5	0								37	0	37	2	2	1	2	134	45	40	1	15	2	17	2	0			1		1	0	0		50	0
32	4	27.2	4	2	0	0	1	0	1	3	1	0	6	1	0.5	0								39	0	39	2	2	1	2	135	48	50	1	0	20	20	3	0			1		1	0	0		50	0
28	5	23.2	1	0	0	0	1	0	0	0	1	1		6	2.5	1	2	0	1					41	2	41.2857	2	0	1	2	132	65	65	0	15	0	15					2	3	1	0	0	0	200	0
35	4	34.6	2	1	0	0	1	0	1	3	1	1	10	10	3.5	1	3	1	1	3	135	55	55	38	6	38.8571	1	3	1	1	170	20	20	1	40	5	45	1	0			1		1	1	1	0	50	0
25	4	21.9	2	1	0	0	0	0	0	0	1	0	5.5	3	1	0								41	0	41	1	2	1	1	135	60	60	1	30	2	32	1	0			1		1	0	0	0	300	0
27	5	41.2	3	0	0	0	4	0	1	1	1	0	2	3	2	1	2	0	1	2	130	65	65	41	5	41.7143	2	0	1	2	164	48	50	0	20	0	20					2	3	1	0	0	0	200	0
28	1	23.5	4	1	1	0	0	0	0	0	1	0	0	1.5	1.5	0								40	1	40.1429	1	2	1	1		40	40	1	0	5	5	2	0			1		1	1	1	0	150	0
38	5	21.2	2	0	0	0	3	0	1	3	1	1			2	0								38	0	38	1	2	1	1		35	35	1	25	5	30	3	2	1		1		1	1	1	0	250	0
28	4	34.9	1	0	0	0	1	0	1	1	1	1	2	2.5	3.5	1	1	1	1	1	138			40	6	40.8571	1	2	1	1	153	52	50	1	15	5	20	2	0			1		1	0	1	0	100	0
27	4	30.9	1	0	0	0	4	0	0	0	1	1	0	7	3.5	1	3	1	1	3	130	50	50	40	4	40.5714	1	2	1	1	140	30	40	1	30	5	35	1	0			1		1	0	1	0	150	0
41	1	31.2	1	0	0	0	1	0	1	2	1	1	1	1	4	1	1	1	1	1	135	70	70	38	0	38	1	2	1	1	138	48	45	1	25	23	48	1	2	1		1		2	1	1	0	350	0
33	4	21.5	2	1	0	0	0	0	0	0	1	0	2	2	1.5	0								38	5	38.7143	1	2	1	1	138	50	50	1	35	5	40	1	0			1		1	0	1	0	500	2
37	4	27.3	1	0	0	0	1	2	1	11	1					0								39	0	39	1	2	1	1		45	45	1	20	10	30	1	0			1		1	0	1	0	50	0
26	4	18.9	1	0	0	0	2	0	1	4	1	1	3	2.5	4.5	1	1	1	1	1	144	40	40	38	3	38.4286	1	3	1	1	200	35	25	1	30	10	40	1	0			1		1	0	0	0	150	0
22	5	20.8	1	0	0	0	0	0	0	0	1	1			4	1	1	1	1	1	122	55	50	40	5	40.7143	1	2	1	1	123	48	40	2	45	4	49	1	0			1		1	1	1	0	500	0
31	4	26.7	2	1	0	0	4	0	0	0	1	1	2	2	3.5	1	1	1	1	1	125	45	50	40	5	40.7143	1	2	1	1	152	52	50	1	40	9	49	1	0			1		1	0	1	0	300	0
22	4	23.5	2	0	0	0	0	0	0	0	1	1	7	5	4	1	1	1	0					38	5	38.7143	1	3	1	1	153	10	10	1	30	10	40	1	0			1		1	0	1	0	200	0
31	4	19.5	1	0	0	0	0	0	1	1	1	1	1.5	1.5	2	0								41	2	41.2857	1	2	1	1	140	40	40	1	0	7	7	2	0			1		1	0	1	0	100	0
25	4	23.7	1	0	0	0	4	3	1	11	1	0	3	4	2	1	1	1	1	1	125	57	60	38	5	38.7143	1	2	1	1	151	24	30	1	25	5	30	3	0			1		2	0	1	0	100	0
33	4	19.9	1	0	0	0	0	0	0	0	1	0	2.5	2.5	1.5	0								40	4	40.5714	1	2	1	1	153	19	20	1	30	10	40	1	0			1		1	0	1	0	50	0
31	4	21.8	1	0	0	0	0	0	0	0	1	1	3.5	3	3.5	1								39	1	39.1429	1	2	1	1	156	40	30	1	30	30	60	1	0			1		1	0	1	0	150	0
31	4	22.5	1	0	0	0	0	0	0	0	1	1	2.5	3	3.5	1	1	0	1	1	131	62	70	40	3	40.4286	1	2	1	1	150	40	30	1	30	18	48	1	0			1		1	1	1	0	150	0
25	4	19.5	1	0	0	0	0	0	0	0	1	1	0.1	2.5	4	1	1	0	1	1	125	54	50	38	6	38.8571	1	2	1	1	164	23	20	1	15	5	20	2	0			1		1	0	1	0	100	0
30	4	19.3	3	1	0	0	0	0	1	1	1	1	2.5	0.5	1.5	0								41	0	41	1	2	1	1	155	39	45	1	10	6	16	2	0			1		1	0	1	0	200	0
36	4	18.1	2	1	0	0	4	0	0	0	1	0	0.75	0.75	1.75	0								39	1	39.1429	1	2	1	1	140	30	30	1	12	5	17	2	0			1		1	0	1	0	100	0
23	4	37.1	2	0	0	0	0	1	1	6	1	1	11	4	3.5	1	1	0	1	1	120	45	35	39	3	39.4286	1	2	1	1	140	25	10	1	30	5	35	1	0			1		1	1	1	0	200	0
29	2	24.9	2	0	0	0	0	0	0	0	1	1	3	1.5	0.5	0								40	4	40.5714	1	3	1	1	145	25	20	1	10	5	15	2	0			1		1	1	1	0	200	0
29	4	24.2	1	0	0	0	0	0	0	0	1	1	0	0.5	0.5	0								38	0	38	1	2	1	1	160	45	20	1	0	4	4	2	0			1		1	1	1	0	150	0
24	4	25.3	3	0	0	0	0	0	0	0	1	1	2	1	0.5	0								39	6	39.8571	1	2	1	1	153	42	40	1	25	5	30	3	0			1		1	0	1	0	50	0
33	4	22	1	0	0	0	0	0	0	0	1	1	10	4	2	0								40	4	40.5714	1	2	1	1	140	34	30	1	30	15	45	3	0			1		1	0	1	0	150	0
22	4	21.5	1	0	0	0	1	0	1	2	1	1	2	4	1	0								38	6	38.8571	2	2	1	2	129	33	50	1	10	20	30	3	3	3		1		1	1	1	0	100	0
30	4	27.4	1	0	0	0	4	0	0	0	1	0	3	1.5	3.5	1	1	0	1	1	108	68		40	5	40.7143	1	2	1	1	120	60	50	1	30	10	40	1	0			1		1	0	0	0	100	0
34	1	25.7	2	0	0	0	1	0	0	0	1	1	0	5.5	3	1	2	0	0					40	4	40.5714	2	1	1	2	102	58	70	1	30	6	36	3	0			1		1	0	3	0	400	0
32	4	19.3	1	0	1	0	4	0	0	0	1	1	4	3	3	1	3	0	1	3	125	60	50	39	0	39	1	2	1	1	140	44	30	1	30	5	35	1	0			1		1	0	2	0	300	0
34	4	24.1	1	0	0	0	4	0	1	11	1	1	1	1	0.5	0								39	0	39	1	1	1	1	157	48	50	3	10	8	18	2	0			1		1	1	1	0	450	0
35	4	22.5	1	0	0	0	0	0	0	0	1	1	1	1.5	1	0								39	3	39.4286	1	1	1	1	131	44	50	3	20	10	30	3	0			1		1	1	1	0	150	0
19	4	27.3	1	0	0	0	0	0	0	0	1	1	2	2	4	1	1	1	0					39	0	39	1	3	1	1	133	32	30	1	20	15	35	2	0			1		1	0	1	0	350	0
29	1	24.2	2	0	0	0	0	3	1	2	1	1	5	1.5	4	1								40	6	40.8571	3	2	1	2		35	40	1	25	10	35	3	0			1		2	1	1	0	1000	2
37	2	27.2	8	1	0	0	1	0	1	3	1	1	5	3	1	0								39	1	39.1429	2	1	1	2	126	55	50	1	15	10	25	1	0			1		1	1	1	0	100	0
26	4	25.5	1	0	0	0	0	0	0	0	1	1	2	2	4	1	1	1	1	1	148	51	50	40	4	40.5714	1	2	1	1		35	40	1	30	10	40	1	0			1		1	0	1	0	400	0
28	1	26.8	3	2	1	0	1	0	0	0	1	0	3	2	3.5	1	2	0	1	2	148	55	50	38	6	38.8571	1	3	1	1	178	45	20	1	30	10	40	1	0			1		1	0	1	0	100	0
34	1	25.7	3	1	0	0	0	1	0	0	1	0	0	2	0.5	0								40	0	40	2	0	1	2	126	56	60	0	5	0	5					2	2	1	0	0	0	200	0
26	1	25.2	1	0	0	0	0	0	0	0	1	1		8	3	1	2	1						39	4	39.5714	2	1	1	2	135	40	50	1	30	10	40	1	0			1		1	0	1	3	300	0
27	4	24.8	1	0	0	0	4	2	0	0	1	1	2	6	4	1	2	1	1	2	137	85	70	39	3	39.4286	1	2	1	1	148	52	30	1	30	5	35	1	0			1		1	0	1	0	500	1
27	4	17.9	1	0	0	0	4	0	0	0	1	1	2	8	2.5	1	2	1	1	2	139	45	45	41	3	41.4286	1	2	1	1	147	30	20	1	30	10	40	1	0			1		1	0	1	0	350	0
29	2	18.7	2	1	0	0	4	0	1	1	1	1	4.5	5.5	3.5	1	3	0	1	3	150	64	50	41	2	41.2857	1	1	1	1	150	60	50	1	30	3	33	1	0			1		1	0	1	0	50	0
28	4	19.9	1	0	0	0	0	0	1	8	1	1	7.5	5	2	0								39	2	39.2857	1	2	1	1	142	43	50	1	35	15	50	1	0			1		1	1	1	0	200	0
31	1	33.2	1	0	0	0	1	0	1	3	1	1	6	4	4	1	1	0						37	1	37.1429	1	0	1	1	151	46	60	0	20	0	20					2	3	1	0	0	0	200	0
35	4	23.6	2	0	0	0	1	0	0	0	1	1	0	9	3.5	1	2	0	1	2	115	54	60	40	4	40.5714	1	2	1	1	140	40	40	1	30	20	50	1	0			1		1	0	1	0	100	0
28	1	27.5	1	0	0	0	1	0	0	0	1	1	2	2	4	1	2	0	1	2	112	55	50	37	4	37.5714	1	0	1	1	117	50	50	0	5	0	5					2	4	1	0	0	0	300	0
36	2	37.9	6	4	0	0	1	0	1	3	1	1	16	3.5	3.5	1								38	3	38.4286	1	2	1	1	152	52	60	1	30	19	49	1	0			1		1	0	0	0	50	0
29	1	19.8	3	0	0	0	0	0	1	2	1	1	5	2	2.5	1								39	5	39.7143	1	2	1	1	162	20	50	1	30	12	42	1	0			1		1	0	1	0	800	2
27	4	23.1	1	0	0	0	0	0	0	0	1	1	6.5	2.5	3.5	1								40	3	40.4286	1	2	1	1	120	40	40	1	30	10	40	1	0			1		1	0	1	0	200	0
29	4	20	2	0	0	0	0	0	0	0	1	1	0	0.5	1	0								40	2	40.2857	1	3	1	1	130	20	20	1	30	3	33	3	0			1		1	0	1	0	150	0
32	2	24.2	1	0	0	0	0	0	0	0	1	1	0	5	1.5	0								38	1	38.1429	1	3	1	1	142	43	50	1	25	5	30	1	0			1		1	1	1	0	200	0
27	4	32.3	1	0	0	0	0	0	1	7	1	1	4	3	3.5	1	2	0	1	2	113	70	80	41	3	41.4286	2	1	1	2	121	49	60	1	30	10	40	1	0			1		1	1	1	0	300	0
34	4	23.9	3	2	0	0	0	0	1	1	1	0	5	5	3.5	1	1	1	1	1	137	46	50	41	6	41.8571	1	2	1	1	137	34	20	1	30	5	35	1	0			1		1	1	1	0	200	0
28	1	32.4	1	0	0	0	0	0	1	0	1	0	2.5	2.75	1	0								40	4	40.5714	1	2	1	1	141	45	50	1	15	5	20	3	0			1		1	0	1	0	100	0
32	1	24.6	2	1	0	0	0	0	0	0	1	0	0	3.75	2	0								38	6	38.8571	2	1	1	2	136	52	50	1	15	15	30	2	2	3		1		1	0	1	0	300	0
29	1	23.4	1	0	0	0	0	2	0	0	1	0	1	1	2	0								39	5	39.7143	3	1	1	3	151	41	40	1	15	5	20	2	0			1		1	1	1	0	400	0
25	1	24.1	1	0	0	0	1	0	1	1	1	1	13	2	4.5	1	1	1	1	1	133	38	40	41	1	41.1429	1	3	1	1	180	10	0	1	35	25	60	1	0			1		1	1	1	0	100	0
30	1	21	1	0	0	0	4	0	0	0	1	1	3	1	4.5	1	1	1	1	1	150	53	50	40	2	40.2857	1	2	1	1	145	45	40	1	30	5	35	2	0			1		1	1	1	0	200	0
25	1	25	3	1	0	0	4	0	0	0	1	0	0	2.5	3	1	3	0	1	3	112	60	60	40	3	40.4286	1	1	1	1	130	55	50	1	15	5	20	2	0			1		1	0	1	0	200	0
29	1	26	2	1	0	0	0	0	0	0	1	0	0	4	1.5	0								40	2	40.2857	2	0	1	2		60	60	0	0	0	0					2	4	1	0	0	0	400	0
37	2	27.8	4	3	0	0	1	0	0	0	1	0	4.5	0.5	1	0								38	0	38	1	2	1	1	152	31	30	1	35	25	60	3	0			1		1	0	1	0	150	0
33	4	23.4	1	0	0	0	0	0	0	0	1	1	0.25	0.5	0.5	0								39	6	39.8571	1	1	1	1	125	51	50	1	15	15	30	2	2	2		1		1	1	1	0	450	0
35	4	25.4	1	0	0	0	0	0	0	0	1	0	3	1	2.5	1	1	1	1	1	150	55	50	39	6	39.8571	1	1	1	1	150	55	50	1	30	4	34	3	0			1		1	1	1	0	200	0
36	4	23.1	1	0	0	0	0	0	0	0	1	1	3	8	2	0								38	5	38.7143	1	2	1	1	153	35	30	1	35	14	49	1	0			1		1	0	1	0	100	0
36	4	25.6	1	0	0	0	1	0	1	3	1	1	5	5	4	1	1	0	0					37	6	37.8571	1	2	1	1	160	41	30	1	30	10	40	1	0			1		1	0	1	0	50	0
35	1	34.7	2	1	0	0	4	0	1	11	1	1	5	2	3.5	1	2		0					38	6	38.8571	2	1	1	2	120	50	50	1	30	10	40	1	0			1		1	0	1	0	300	0
25	1	19.8	2	1	1	0	1	0	0	0	1	0	2.5	3.5	2	0								41	0	41	1	2	1	1	140	25	20	1	20	5	25	2	0			1		1	1	1	0	300	0
30	1	25.2	1	0	0	0	0	0	0	0	1	1	2	6.5	3.5	1	1	1	1	1	121	46	40	40	2	40.2857	1	2	1	1	147	17	20	1	30	15	45	1	0			1		1	1	1	0	150	0
31	1	19.1	3	0	0	0	0	0	0	0	1	0	3	2	1.5	0								39	0	39	2	2	1	2	170	19	20	1	0	10	10	2	0			1		1	1	1	0	50	0
31	4		1	0	0	0	0	0	1	1	1	1	0	3	4	1	1	0	1	1	113	58	50	41	5	41.7143	1	2	1	1	140	41	40	1	30	10	40	1	0			1		1	0	1	0	400	0
32	4	27.1	1	0	0	0	4	0	1	11	1	1	12	13	6	1	1	0	1	1	139	60	60	38	6	38.8571	1	1	1	1	146	40	30	1	30	20	50	1	3	1		1		1	0	1	0	50	0
27	4	17.9	1	0	0	0	4	0	1	2	1	1	6	10	3	1	1		0					38	6	38.8571	1	2	1	1	138	30	30	1	30	20	50	1	0			1		1	0	1	0	150	0
28	4	24.8	2	1	0	0	4	0	0	0	1	1	2.5	0	1.5	0								38	4	38.5714	1	2	1	1	176	38	40	1	10	5	15	2	0			1		1	0	1	0	150	0
39	5	21.3	2	1	0	0	0	0	0	0	1	1	1	2	3	1	1	2	0					39	4	39.5714	1	3	1	1	168	36	25	1	30	15	45	1	0			1		1	0	1	0	200	0
32	4	20.3	3	1	1	0	0	0	0	0	1	1	1	0.5	3	1	1	1	0					39	0	39	1	2	1	1	150	30	30	1	20	10	30	2	0			1		1	0	0	0	600	2
31	1	23.1	1	0	0	0	0	0	0	0	1	1	15	1	1	0								41	1	41.1429	1	1	1	1	135	50	60	1	10	5	15	2	0			1		1	0	1	0	400	0
24	1	26.1	1	0	0	0	1	1	1	6	1	1	9	1	4	1	1	1	1	1	135	39	40	38	2	38.2857	1	2	1	1	141	29	30	1	30	10	40	1	0			1		1	1	2	0	200	0
30	4	27.8	1	0	0	0	0	0	1	1	1	1	6	7	2	0								41	5	41.7143	1	2	1	1		59	60	1	0	8	8	2	0			1		1	0	1	0	400	0
26	4	24.1	1	0	0	0	0	0	0	0	1	1	7	6.5	0.5	0								41	0	41	2	3	1	3	163	23	20	1	15	18	33	3	0			1		1	0	0	0	50	0
27	1	33.2	1	0	0	0	1	1	1	3	1	1	8	5	4	1	1	0	1	1	130	53	60	39	0	39	1	0	1	1	125	39	40	1	0	10	10	1	0			2	6	1	0	0	0	700	0
41	1	26	1	0	0	0	1	0	1	2	1	1	3	7	5	1	1	1	1	1	150	43	50	39	0	39	1	2	1	1	137	32	40	1	30	19	49	1	0			1		1	0	0	0	50	0
29	4	20.8	1	0	0	0	0	0	1	1	1	1	3.5	0.5	0.5	0								41	1	41.1429	2	0	1	2	109	58	70	0	0	0	0					2	4	2	0	0	0	300	0
29	4	21.5	1	0	0	0	0	0	0	0	1	1	7	2.5	0.5	0								40	1	40.1429	3	1	1	3	155	59	50	1	30	10	40	3	0			1		1	0	1	0	100	0
38	4	25.5	2	0	0	0	1	0	1	1	1	1	0	2	5	1	1	1	1	1	150	50	50	41	2	41.2857	1	2	1	1	154	20	20	1	30	5	35	1	0			1		0	1	0	0	300	0
33	1	20.6	1	0	0	0	0	0	0	0	1	1	0	4	3.5	1	1	0	1	1	116	52	50	41	0	41	1	1	1	1	117	48	50	0	5	5	10					2	3	1	0	0	0	300	0
29	1	41	1	0	0	0	0	1	1	2	1	1	12	3	1.5	0								38	0	38	1	2	1	1	145	35	30	1	30	5	35	1	0			1		1	0	1	0	350	0
26	4	17.8	1	0	0	0	0	0	0	0	1	1	4.5	4	4.5	1	1	0	1	1	153	53	60	39	2	39.2857	1	2	1	1	169	39	50	1	30	15	45	1	0			1		1	0	0	0	1100	2
33	4	32.6	2	0	0	0	1	1	1	3	1	1	9	2	4.5	1	1	0	1	1	143	65	70	38	5	38.7143	1	1	1	1	118	63	65	0	20	0	20					2	3	1	0	0	0	200	0
40	1	25.1	6	0	0	0	4	0	1	11	1	1	6	1	2	0								39	1	39.1429	1	3	1	1	161	33	30	1	30	10	40	1	0			1		1	0	1	0	50	0
32	4	22.8	2	0	0	0	4	0	0	0	1	1	6	3	2	0								40	0	40	1	2	1	1	155	29	15	1	40	15	45	1	0			1		1	0	0	0	50	0
27	2	33.1	3	2	0	0	0	0	0	0	1	1	3	2	2	0								39	5	39.7143	1	1	1	1	128	72	70	1	3	10	13	2	0			1		2	0	0	0	50	0
35	4	21.6	2	1	1	0	0	0	0	0	1	1	0	0	2.5	1	2	1	1	2	133	39	40	39	1	39.1429	1	2	1	1	140	35	30	1	30	5	35	1	0			1		1	0	1	0	200	0
37	1	23.6	6	3	0	0	4	1	1	6	1	1	3	0	1.5	0								38	0	38	2	2	1	2	145	35	30	1	30	5	35	1	0			1		1	0	1	0	250	0
25	4	24.8	1	0	0	0	4	0	0	0	1	1	2.5	1.5	3.5	1	1	1	1	1	156	55	30	38	3	38.4286	1	2	1	1	146	48	10	1	30	6	36	1	0			1		1	1	1	0	350	0
26	4	24.4	1	0	0	0	0	0	1	9	1	1	6	3	4.5	1	2	1	1	2	140	33	40	40	1	40.1429	2	2	1	2	157	18	30	1	30	34	64	1	2	3		1		1	1	1	0	200	0
27	2	20.1	1	0	0	0	0	3	0	0	1	1	0.5	5	3	1	1	0	1	1	138	38	30	40	5	40.7143	1	2	1	1	168	15	10	1	20	5	25	2	0			1		1	1	1	0	350	0
30	4	24.8	1	0	0	0	4	0	0	0	1	1	6.5	5	2.5	1	1	0	1	1	140	50	50	41	2	41.2857	1	2	1	1	147	40	40	1	30	10	40	1	0			1		1	1	1	0	350	0
33	1	29.4	1	0	0	0	0	0	0	0	1	1	0	7	4	1	1	1	1	1	120	50	50	39	4	39.5714	1	2	1	1	153	43	20	1	25	8	33	2	0			1		1	1	2	0	400	0
25	1	24.9	1	0	0	0	0	0	1	2	1	1	3	2.5	4	1	1	2	1	1	137	34	40	40	0	40	1	2	1	1	171	32	30	1	30	14	44	1	2	1		1		1	1	2	0	400	0
25	4	25.7	2	0	0	0	0	3	0	0	1	1	1	1.5	5	1	1	1	1	1	138	54	60	38	6	38.8571	1	3	1	1		12	10	1	50	10	60	1	0			1		1	1	1	0	50	0
35	5	33.9	1	0	0	0	1	0	1	3	1	1	5.5	4	4	1	1	0	1	1	140	57	60	39	2	39.2857	1	2	1	1	177	46	40	1	35	15	50	1	0			1		1	0	1	0	100	0
25	1	24.2	1	0	0	0	4	0	0	0	1	1	4.5	4.5	4	1	2	0	1	2	115	62	70	40	0	40	2	1	1	2	126	59	60	1	20	5	25	1	1			2	6	1	0	0	0	1200	2
35	4	27.3	2	1	0	0	2	0	0	0	1	1	6	1	3	1	2	0	1	2	155	54	60	38	3	38.4286	2	2	1	2	170	54	50	1	30	10	40	2	2	2		1		1	0	1	0	100	0
36	1	23.1	4	0	0	0	0	0	0	0	1	1	3	2.5	4.5	1	1	0	1	1	116	60	65	39	4	39.5714	1	2	1	1	133	44	50	1	30	12	42	1	0			1		1	0	1	0	250	0
30	4	24.7	1	0	0	0	2	2	1	5	1	1	5	1.5	0.5	0								37	1	37.1429	2	2	1	2	147	34	40	1	20	10	30	2	0			1		1	0	0	0	150	0
28	1	21.8	1	0	0	0	4	0	1	2	1	1	10	5	3.5	1	3	1	1	3	135	40	40	38	5	38.7143	3	2	1	3	135	35	30	1	30	10	40	1	0			1		1	0	2	0	150	0
29	4	19.8	1	0	0	0	1	0	1	1	1	1	2.5	2	3.5	1	1							41	1	41.1429	1	1	1	1	163	41	50	1	30	4	34	1	0			1		1	0	1	0	400	0
39	4	27.6	1	0	0	0	1	0	0	0	1	1	6	2	3.5	1	1	0	1	1	154	69	60	40	3	40.4286	1	1	1	1	147	52	60	1	30	3	33	1	0			1		1	0	1	0	500	2
35	6	28.1	1	0	0	0	0	0	1	8	1	1	14	8	2.5	1	1	0	1	1	111	79	70	39	2	39.2857	1	0	1	1	132	56	50	1	10	0	10	1	0			2	3	1	0	0	0	200	0
31	1	31.2	1	0	0	0	1	0	1	2	1	1	1.5	2	2	0								39	5	39.7143	1	2	1	1	140	35	20	1	30	8	38	1	0			1		1	1	1	0	100	0
31	4	29.4	1	0	0	0	4	0	1	2	1	1	5	2	4.5	1	1	0	1	1	150	62	60	39	5	39.7143	1	3	1	1	160	37	30	1	35	15	50	1	0			1		1	1	1	0	100	0
36	4	19.5	2	1	0	0	0	0	0	0	1	0	0	0.5	0.5	0								38	1	38.1429	1	2	1	1	152	27	20	1	0	15	15	2	0			1		1	1	1	0	250	0
26	4	22.8	3	0	0	0	1	0	1	1	1	1	5	2	3.5	1	1	1	0					42	0	42	2	2	1	2	140	40	30	1	35	10	45	1	0			1		1	1	0	0	300	0
27	1	32.1	2	1	1	0	0	0	0	0	1	1	0	1	3.25	1	1	0	0					41	3	41.4286	2	2	1	2	125	45	50	0	0	0	0					2	3	1	0	0	0	200	0
31	4	29.8	1	0	0	0	0	0	1	1	1	1	9	2.5	4	1	1	1	1	1	135	53	50	41	3	41.4286	1	2	1	1	144	45	40	1	35	10	45	1	0			1		1	0	1	0	250	0
32	1	22.9	1	0	0	0	0	0	1	7	1	1	0	1	0.5	0								41	1	41.1429	1	3	1	1	160	20	10	1	30	5	35	1	0			1		1	0	1	0	200	0
33	1	22.5	2	1	0	0	4	0	1	1	1	1	3	1.5	3	1	1	1	1	1	130	63	50	41	2	41.2857	1	2	1	1	160	60	50	3	30	20	50	1	0			1		1	0	0	0	100	0
29	4	21.8	1	0	0	0	0	0	0	0	1	1	1.5	2.5	3.5	1	1	1	1	1	120	60	60	39	1	39.1429	1	2	1	1	153	45	50	1	20	10	30	3	0			1		1	1	1	0	550	2
31	4	21.8	1	0	0	0	4	2	1	5	1	1	5	3	3	1	1	1	1	1	139	49	50	39	0	39	1	2	1	1	169	21	10	1	30	5	35	3	0			1		1	1	0	0	50	0
27	4	38.8	1	0	0	0	2	0	1	4	1	1	5	8	3.5	1	1	1	1	1	131	53	60	41	2	41.2857	1	2	1	1	134	43	50	1	30	10	40	1	0			1		1	0	1	0	450	0
24	4	28.2	1	0	0	0	1	0	0	0	1	1	7	6	4	1	1	0	1	1	121	62	70	38	2	38.2857	1	1	1	1	134	45	50	1	10	10	20	1	0			2	6	1	0	0	0	300	0
28	1	22.7	1	0	0	0	0	0	0	0	1	0	0	2	2	0								40	5	40.7143	1	2	1	1	150	36	20	1	30	20	50	1	2	1		1		1	0	1	0	300	0
28	1	20.3	2	1	0	0	0	0	0	0	1	1	1	2.75	1	0								40	2	40.2857	1	2	1	1	149	48	40	1	15	5	20	2	0			1		1	1	1	0	150	0
23	4	17.7	2	0	0	0	0	0	0	0	1	1	1	3	4	1	1	1	1	1	135	45	45	40	1	40.1429	1	3	1	1	180	27	20	1	35	10	45	1	0			1		1	0	1	0	150	0
22	1	23.1	2	1	0	0	0	0	1	1	1	1	5	4	4	1	1	1	1	1	140	48	40	41	2	41.2857	1	2	1	1	169	35	30	1	20	15	35	1	2	1		1		1	1	1	0	250	0
31	4	23.3	2	0	0	0	0	0	0	0	1	1	4	1	4	1	1		0					39	2	39.2857	1	2	1	1	166	33	40	1	30	10	40	1	0			1		1	0	1	0	50	0
27	4	28.7	1	0	0	0	0	0	1	1	1	1	1	3	2	0								41	2	41.2857	2	2	1	2	152	63	60	1	10	10	20	3	0			1		1	0	1	0	150	0
37	4	19.4	2	1	0	0	0	0	0	0	1	0	3	2	2	0								39	3	39.4286	1	1	1	1	137	47	45	1	30	5	35	1	0			1		1	0	1	0	350	0
33	4	27.3	2	0	0	0	0	0	0	0	1	1	3	2.5	4.5	1	1	1	1	1	127	55	60	40	6	40.8571	1	2	1	1	173	23	20	1	35	17	52	1	0			1		1	0	1	0	100	0
32	4	28.1	3	1	0	1	0	1	1	6	1	1	1	0.25	0.25	0								38	2	38.2857	2	2	1	2	168	40	50	1	0	15	15	2	0			1		1	0	1	0	1300	3
38	2	22.5	2	1	0	0	0	0	0	0	1	1	3	1.5	4.25	1	2	0	1	2	127	76	90	40	2	40.2857	2	0	1	2	139	81	80	0	15	0	15					2	3	1	0	0	0	500	0
34	5	24.6	1	0	0	0	1	0	0	0	1	1	8	6	0.75	0								37	2	37.2857	2	1	1	2	149	41	40	1	15	15	30	3	2	1		1		2	0	1	0	150	0
22	1	31.9	2	1	0	0	1	0	1	3	1	1	4	3	2.5	1	1	1	0					38	4	38.5714	1	2	1	1	154	42	40	1	30	10	40	1	0			1		1	1	1	0	400	0
40	5	26.1	2	0	0	0	2	0	1	4	1	1											60	38	2	38.2857	1	2	1	1	140	40	40	1	0	3	3	2	0			1		1	0	2	0	450	0
29	4	21.4	1	0	0	0	0	0	0	0	1	1	7	5.5	3.5	1	2	1	1	2	149	50	50	41	4	41.5714	2	2	1	2	170	30	30	1	30	15	45	1	0			1		1	1	1	0	50	0
24	4	23.5	1	0	0	0	0	0	0	0	1	0	2	2	1	0								40	4	40.5714	1	2	1	1	140	28	10	1	30	7	37	3	0			1		1	0	1	0	50	0
22	2	30.5	2	1	1	0	0	0	0	0	1	1	2	2	2	0								40	2	40.2857	2	2	1	2	145	27	35	1	30	5	35	1	0			1		1	1	1	0	50	0
31	4	30.7	1	0	0	0	0	0	0	0	1	1	7	3	1.5	0								39	1	39.1429	1	2	1	1	165	36	30	2	35	15	50	3	2	3		1		1	1	1	0	200	0
37	1	21.8	1	0	0	0	1	0	1	3	1	1	1	3	4	1	1	1	1	1	120	45	60	39	1	39.1429	1	2	1	1	165	36	30	1	30	20	50	1	0			1		1	1	1	0	600	1
30	1	18.4	3	0	0	0	0	0	0	0	1	1	5	9	2	0								39	6	39.8571	1	2	1	1	138	35	35	3	30	15	45	3	0			1		2	1	2	0	800	2
21	2	25.8	2	0	0	0	0	0	1	1	1	1	1	5	4.5	1	1	1	1	1	118	55	40	41	2	41.2857	1	3	1	1	170	16	10	1	45	15	60	1	0			1		1	1	1	0	350	0
36	4	31.5	1	0	0	0	1	0	0	0	1	0	0	2	4	1	1	0	1	1	130	60	60	39	4	39.5714	1	1	1	1	140	55	50	2	35	15	50	1	0			1		1	1	1	0	250	0
32	1	25.4	2	0	0	0	0	0	0	0	1	1	20	5	2	0								39	3	39.4286	1	2	1	1	155	30	30	1	30	10	40	3	0			1		1	0	1	0	150	0
30	4	22.5	1	0	0	0	0	0	1	2	1	1	10	2	4	1	1	2	1	1	150	43	30	40	4	40.5714	1	3	1	1	172	24	10	1	35	15	50	1	0			1		1	1	1	0	150	0
31	4	25.8	2	1	1	0	0	0	0	0	1	1	0	3.5	2.5	1								41	2	41.2857	1	0	1	1	127	65	60	0	5	0	5					2	3	1	0	0	0	250	0
29	1	29.4	1	0	0	0	0	0	0	0	1	1	7.5	8	1	0								41	4	41.5714	3	1	1	3	160	65	60	1	0	11	11	2	0			1		1	0	1	0	250	0
33	4	32.1	3	0	0	0	0	0	1	6	1	1	11	3	3.5	1	1	0	1	1	115	60	60	38	4	38.5714	1	0	1	1	120	40	40	0	20	0	20					2	3	1	0	0	0	200	0
27	1	26.1	3	2	1	0	0	0	0	0	1	0	2	0.5	1.5	0								38	0	38	2	2	1	2	157	24	30	1	15	5	20	3	0			1		1	0	1	0	200	0
33	2	25.2	1	0	0	0	1	0	0	0	1	0	2	4	1	0								38	6	38.8571	1	2	1	1	158	38	30	1	35	5	40	1	0			1		1	0	1	0	100	0
29	4	17.5	2	1	0	0	4	0	1	1	1	1	4	1.5	2	0								41	1	41.1429	1	2	1	1	161	25	30	1	35	5	40	1	0			1		1	0	0	0	150	0
22	4	26.1	1	0	0	0	0	0	1	2	1	1	4	1	3.5	1	2	0	1	2	130	57	70	40	6	40.8571	2	0	1	2	130	55	70	0	10	0	10					2	3	1	0	0	0	200	0
30	4	22.6	1	0	0	0	0	0	1	1	1	1	7	6.5	4	1	1	1	1	1	155	55	40	41	3	41.4286	1	2	1	1	170	49	30	1	20	10	30	3	0			1		2	0	1	0	300	0
31	4	24.1	2	1	1	0	0	0	0	0	1	1	4	0	2	0								39	1	39.1429	2	1	1	2	160	49	40	1	5	8	13	2	0			1		2	0	1	0	300	0
44	1	26.1	2	1	0	0	4	0	1	1	1	1	6	1	3	1	1	0	1	1	123	75	80	41	3	41.4286	1	2	1	1	170	45	40	1	20	5	25	2	0			1		1	0	1	0	200	0
25	4	28.3	1	0	0	0	0	0	1	1	1	1	5	2.5	2	0								41	0	41	1	1	1	1	138	45	30	1	20	10	30	2	0			1		1	1	1	3	600	1
34	4	32.3	2	1	0	0	1	0	0	0	1	1	6	2	3.5	1	2	0	0					39	5	39.7143	2	0	1	2	148	60	60	1	35	25	60	1	0			1		1	1	1	0	200	0
32	2	27.3	4	0	0	0	4	0	0	0	1	0	0.5	3	1.5	0								39	6	39.8571	1	2	1	1	163	46	60	1	10	11	21	3	0			1		1	0	1	0	200	0
34	1	23.9	2	0	0	0	0	0	1	1	1	1	6.75	4.5	5	1	1	0	1	1	112	50	60	41	4	41.5714	1	2	1	1	150	37	40	1	50	30	80	1	3	1		1		1	1	2	0	750	1
29	4	22.7	1	0	0	0	0	0	0	0	1	1	2	2	3.25	1	1	1	0					40	1	40.1429	1	2	1	1	159	35	20	1	30	15	45	1	0			1		1	0	1	0	300	0
35	1	25.9	1	0	0	0	0	1	1	6	1	1	10	3	4.25	1	1	0	1	1	144	64	70	38	3	38.4286	1	2	1	1	155	37	40	1	30	15	45	1	0			1		1	1	0	0	200	0
24	4	19.1	1	0	0	0	0	0	1	11	1	1	4.5	0.5	0.25	0								40	4	40.5714	1	1	1	1	140	43	40	1	5	10	15	2	0			1		2	1	1	1	150	0
33	4	25.9	3	1	0	0	2	2	1	4	1	0	3.5	0	0.5	0								39	0	39	1	1	1	1	142	58	60	1	10	10	20	2	0			1		2	0	1	0	70	0
36	5	19.5	1	0	0	0	0	0	0	0	1	0	4	1	1.5	0								39	3	39.4286	1	3	1	1		25	20	1	10	5	15	2	0			1		1	0	1	0	50	0
38	1	24.2	2	1	0	0	1	0	0	0	1	0	0	3.5	3	1	1	1	1	1	132	50	55	39	5	39.7143	1	2	1	1	164	25	0	1	15	5	20	2	0			1		1	0	0	0	150	0
26	1	38.1	2	0	0	0	1	0	0	0	1	1	2.5	2	4.5	1	2	0	1	2	130	55	60	38	5	38.7143	2	0	1	2	130	52	60	0	30	0	30					2	3	1	0	0	0	300	0
37	4	21.7	1	0	0	0	0	0	1	1	1	1	0.25	0.5	2	0								41	1	41.1429	1	1	1	1	135	53	50	1	30	20	50	3	0			1		2	1	1	0	100	0
23	1	27.2	4	0	0	0	0	0	0	0	1	1	0	4.25	4.75	1	3	1	1	3	150	46	60	38	5	38.7143	1	2	1	1	177	24	20	1	30	10	40	1	0			1		1	0	1	0	50	0
32	4	22.2	1	0	0	0	0	0	1	8	1	1	5.5	2.5	0.5	0								39	1	39.1429	1	2	1	1	143	40	40	1	0	20	20	3	0			1		1	1	0	0	100	0
33	4	30.9	3	1	1	0	0	0	0	0	1	1	5	2	2	0								41	4	41.5714	1	2	1	1	145	45	40	3	10	10	20	1	0			1		2	1	1	0	850	3
18	4	23.7	1	0	0	0	0	0	0	0	1	0	1.25	2.25	2.25	1								38	5	38.7143	1	2	1	1	151	37	40	1	30	15	45	1	0			1		1	1	1	0	200	0
27	1	24.1	2	0	0	0	0	0	1	1	1	1	3.5	5	3.5	1	1	1	0					41	4	41.5714	1	2	1	1	155	44	50	1	10	10	20	2	0			1		1	0	1	0	200	0
32	4	29.6	1	0	0	0	1	0	1	3	1	1	1	4.5	4	1	2	0	1	2	135	51	60	39	3	39.4286	2	2	1	2	151	37	30	1	30	10	40	1	0			1		2	1	1	0	150	0
33	4	28.5	2	1	1	0	0	0	0	0	1	0	2	1	0.5	0								40	0	40	1	2	1	1	180	20	20	1	15	5	20	2	0			1		1	0	1	0	50	0
25	4	22.2	1	0	0	0	0	0	0	0	1	1	1	1	0.5	0								39	6	39.8571	1	2	1	1	161	32	40	1	0	20	20	2	3	2		1		1	0	1	0	50	0
31	4	17.7	1	0	0	0	0	0	0	0	1	1	0	5	4	1	3	0	1	3	163	47	50	40	2	40.2857	3	1	1	3	164	50	50	1	30	10	40	1	0			1		1	0	1	0	400	0
35	4	17.8	1	0	0	0	0	0	0	0	1	1	0	6	3.5	1	1	0	1	1	145	60	60	38	3	38.4286	1	2	1	1	175	30	30	1	30	10	40	1	0			1		2	1	1	0	200	0
28	4	27.6	1	0	0	0	0	0	1	1	1	1	12	1.5	2.5	1								41	6	41.8571	1	2	1	1	149	38	50	1	20	18	38	3	0			1		1	0	0	0	50	0
28	1	30.1	6	5	0	0	2	0	0	0	1	1	0.5	0.5	2	0								39	1	39.1429	1	1	1	1	125	51	70	1	10	10	20	1	0			1		1	0	0	0	200	0
36	4	22.6	3	1	0	0	0	0	0	0	1	0	0	1.5	3.5	1	1	1	0					39	0	39	1	2	1	1	130	37	40	1	30	10	40	1	0			1		1	0	0	0	300	0
26	4	24.9	1	0	0	0	0	0	0	0	1	1	5	8	4	1	1	0	1	1	125	69	70	41	2	41.2857	1	1	1	1	154	63	70	1	30	5	35	1	0			1		1	0	0	0	1100	3
26	4	22.1	2	1	0	0	0	0	0	0	1	0	0	3	1	0								40	6	40.8571	1	1	1	1	170	60	60	1	20	5	25	3	0			1		1	0	1	0	200	0
29	4	21.5	1	0	0	0	0	0	0	0	1	1	7	7	4.75	1	3	1	1	3	100	45	50	40	0	40	1	2	1	1	156	44	40	1	30	10	40	1	0			1		1	0	1	0	150	0
41	2	26.4	6	4	0	0	1	0	0	0	1	1	0	1.75	4	1	1	0	1	1	110	70	80	39	1	39.1429	1	1	1	1	138	70	80	1	30	10	40	1	0			1		1	0	0	0	300	0
34	1	34.4	4	1	1	0	1	0	0	0	1	1	1	8	1	0								41	3	41.4286	1	2	1	1	150	30	30	1	30	15	45	1	0			1		1	0	2	0	400	0
24	4	23.7	1	0	0	0	0	0	1	1	1	1	2	4	3	1								41	2	41.2857	1	3	1	1		22	20	1	30	5	35	1	0			1		1	0	1	0	50	0
22	2	23.1	1	0	0	0	0	0	0	0	1	1	4	4	4.5	1	2	1	1	2	162	51	50	40	2	40.2857	2	2	1	2	162	31	40	1	20	20	40	1	3	1		1		1	1	1	0	150	0
36	4	22.2	2	0	0	0	1	0	1	11	1	1	12.5	1.5	4	1	1	1	1	1	144	51	60	38	3	38.4286	1	2	1	1	154	41	40	1	35	10	45	1	0			1		1	0	1	0	200	0
34	4	27.1	2	0	0	0	1	0	1	3	1	1	7	5.5	3	1	1	1	1	1	115	50	60	38	3	38.4286	1	2	1	1	123	41	50	1	30	15	45	3	0			1		1	1	1	0	100	0
31	1	33.9	4	3	0	0	0	0	1	11	1	1	4	1	2	0								38	0	38	1	2	1	1	145	49	40	1	35	2	37	1	0			1		1	0	0	0	200	0
27	4	26.6	1	0	0	0	0	0	0	0	1	1	0	0.5	1.5	0								39	4	39.5714	1	2	1	1	124	30	30	1	30	10	40	3	0			1		1	0	1	0	100	0
39	4	27.8	1	0	0	0	2	0	1	4	1	1	3	2	2	0								40	4	40.5714	2	0	1	2	135	54	70	0	0	0	0					2	3	1	0	0	0	100	0
28	4	30.3	1	0	0	0	4	0	1	1	1	1	12	4	2	0								40	5	40.7143	2	2	1	2	138	45	30	1	0	5	5	2	0			1		1	0	1	0	200	0
31	4	22.3	1	0	0	0	0	0	0	0	1	1	0	1	1	0								38	6	38.8571	2	2	1	2		20	20	1	30	5	35	3	0			1		1	0	1	0	300	0
29	4	23.4	1	0	0	0	0	0	0	0	1	1	11.5	4	3.5	1	1	0	1	1	157	73	70	40	1	40.1429	1	1	1	1	125	58	55	3	35	5	40	1	0			1		1	0	1	0	300	0
32	1	43.3	2	0	0	0	0	0	0	0	1	1	9	6	4	1	1	0	1	1	127	67	70	39	4	39.5714	1	2	1	1	142	46	40	1	30	5	35	3	0			1		1	0	1	0	250	0
33	1	27.6	2	0	0	0	0	0	0	0	1	1	2	4	3	1	1	1	1	1	114	51	50	39	0	39	3	1	1	3	126	43	40	1	30	15	45	1	0			1		1	1	1	0	250	0
35	4	24.8	1	0	0	0	0	0	0	0	1	1	0.5	5	3.5	1	1	1	1	1	120	38	40	39	6	39.8571	1	2	1	1	144	40	40	1	30	5	35	1	0			1		1	1	0	0	100	0
28	4	33.4	1	0	0	0	0	1	1	6	1	1	3	1	2	0								39	2	39.2857	1	2	1	1	175	40	40	1	20	10	30	3	0			1		2	1	1	0	700	1
22	1	25.9	1	0	0	0	0	0	0	0	1	1	2	6	3	1								40	5	40.7143	1	2	1	1	150	30	30	1	30	3	33	1	0			1		1	1	0	0	200	0
31	4	32.7	1	0	0	0	1	4	0	0	1	1	3	8	3	1	2	0						40	1	40.1429	2	2	1	2	155	25	20	1	30	4	34	1	0			1		1	1	0	0	300	0
30	4	24.6	1	0	0	0	0	0	1	1	1	1	3	2	4	1	2	1	1	2	120	53	60	41	3	41.4286	1	2	1	1	140	45	40	1	20	10	30	2	0			1		1	0	1	3	100	0
26	1	23.2	1	0	0	0	0	0	0	0	1	1	3	6	3	1	1	1	1	1	118	58	60	39	6	39.8571	1	1	1	1	124	55	50	3	20	5	25	3	0			1		1	1	1	0	300	0
29	4	24.6	2	1	1	0	0	0	0	0	1	1	5	2	2	0								40	6	40.8571	1	0	1	1	100	65	70	0	15	0	15					2	3	1	0	0	0	200	0
30	4	22.7	1	0	0	0	0	0	0	0	1	1	0	9	2.5	1	1	0	1	1	166	60	60	39	0	39	1	2	1	1	175	30	20	1	20	10	30	3	0			1		1	0	1	0	100	0
29	4	22.2	2	0	0	0	1	0	0	0	1	1	4	5.5	0.5	0								41	5	41.7143	1	2	1	1	140	40	30	1	15	5	20	2	0			1		1	0	1	0	120	0
29	4	19.1	1	0	0	0	4	0	0	0	1	1	4	2	3.5	1	1	1	1	1	128	56	50	39	6	39.8571	1	2	1	1	138	36	25	1	30	15	45	1	0			1		1	1	0	0	200	0
28	4	26.4	3	0	0	0	4	0	1	8	1	1	1	0.25	0.25	0								39	2	39.2857	2	2	1	2	133	45	50	3	0	5	5	2	0			1		1	1	0	0	200	0
31	4	19.9	1	0	0	0	1	0	1	2	1	1	4	2	3	1	3	0	1	3	118	65	60	40	2	40.2857	3	2	1	3	147	40	40	1	30	15	45	1	0			1		2	1	0	0	250	0
32	4	24.9	1	0	0	0	0	3	1	11	1	1	9	2	4.5	1	1	0	1	1	150	60	60	40	0	40	1	1	1	1	145	58	60	1	35	10	45	3	0			1		1	0	1	0	1100	3
40	4	23.6	1	0	0	0	0	0	1	2	1	1	6	2	1	0								38	5	38.7143	1	1	1	1	133	60	70	1	0	15	15	2	0			1		1	0	1	0	150	0
31	4	27.9	1	0	0	0	0	0	0	0	1	1	9	4	3.5	1	2	0	1	2	148	67	70	39	2	39.2857	2	1	1	2	150	50	50	1	25	15	40	1	0			2	6	1	0	0	0	200	0
34	4	18.7	1	0	0	0	0	2	1	5	1	1	6	2	3.5	1	2	0	1	2	145	60	60	38	4	38.5714	2	1	1	2	148	45	50	1	20	10	30	2	0			1		1	1	1	0	500	0
29	4	24.4	1	0	0	0	0	0	1	1	1	1	10	4	4	1	2	0	1	2	157	54	50	41	0	41	2	1	1	2	148	50	50	1	35	10	45	1	0			1		1	0	0	0	200	0
33	4	27.4	1	0	0	0	0	0	0	0	1	1	5.5	1.5	0.5	0								41	0	41	1	1	1	1	158	70	70	1	0	15	15	2	0			1		1	0	1	0	100	0
38	1	31.6	3	0	0	0	1	0	1	2	1	1	8.5	6.5	3.5	1	1	0	1	1	159	61	70	39	2	39.2857	1	2	1	1	175	42	50	1	30	5	35	1	0			1		2	1	1	0	300	0
24	1	23.1	1	0	0	0	0	0	0	0	1	1	15	6	4	1	2	0	1	2	136	45	60	40	4	40.5714	1	2	1	1	135	47	50	1	30	20	50	1	2	1		1		1	1	1	0	1250	1
39	4	19.7	3	2	1	0	0	0	0	0	1	0	1	4	2	0								41	2	41.2857	1	2	1	1	140	50	50	1	10	10	20	2	0			1		1	0	0	0	100	0
22	1	23.9	2	1	1	0	0	0	0	0	1	1	0	5	4	1	3		0					40	3	40.4286	3	3	1	3	145	35	20	1	30	20	50	1	0			1		1	0	1	0	300	0
26	4	27.9	1	0	0	0	0	0	1	1	1	1	14	2	2	0								41	4	41.5714	1	3	1	1	170	21	20	1	30	10	40	1	0			1		1	0	1	0	150	0
26	2	17.7	1	0	0	0	0	0	0	0	1	1	2	1	3	1	1	1	1	1	110	56	60	38	5	38.7143	1	2	1	1	131	38	40	1	0	15	15	2	0			1		1	0	1	0	200	0
31	1	23.9	1	0	0	0	0	0	0	0	1	1	8	7	4	1								41	2	41.2857	1	0	1	1	119	55	60	0	0	0	0					2	4	1	0	0	0	300	0
27	4	19.1	3	0	0	0	0	0	0	0	1	1	6	4	4	1	1	0	1	1	110	82	80	38	2	38.2857	1	2	1	1	147	45	40	1	30	15	45	1	0			1		1	0	1	0	100	0
26	4	19.2	2	0	0	0	0	0	0	0	1	1	7	2	4	1	2	0	1	2	128	56	50	40	0	40	2	2	1	2	140	37	40	1	30	20	50	3	0			1		1	1	0	0	800	3
27	4	22.3	2	0	0	0	0	0	0	0	1	1	3	5	3	1								40	4	40.5714	1	1	1	1	130	46	40	1	10	5	15	1	0			1		1	1	1	0	200	0
32	4	26.2	1	0	0	0	0	0	1	1	1	1	2	6	3.5	1	3	0	1	3	126	74	70	41	1	41.1429	3	0	1	3	126	73	70	0	0	0	0					2	3	1	0	0	0	100	0
30	4	23.1	1	0	0	0	0	0	0	0	1	1	0	3	2	0								38	0	38	1	2	1	1	148	25	30	1	30	10	40	3	0			1		1	0	1	0	150	0
32	4	25.6	2	0	0	0	0	0	0	0	1	1	1.5	4	3	1	1	1	1	1	130	60		37	5	37.7143	1	2	1	1	160	40	40	1	40	20	60	1	0			1		1	0	0	0	50	0
29	4	29.7	2	0	0	0	1	0	0	0	1	0	1	6	3	1	1	1	1	1	142	35	40	38	5	38.7143	1	2	1	1	153	25	20	1	30	15	45	1	0			1		1	0	1	0	100	0
35	4	32.9	1	0	0	0	0	0	1	1	1	1	8	2	3	1	1	0	1	1	150	66	70	41	3	41.4286	1	2	1	1	156	45	40	1	40	10	50	1	0			1		1	0	1	0	100	0
31	1	23.5	1	0	0	0	0	0	1	1	1	1	3	0	2	0								41	6	41.8571	1	2	1	1	150	39	40	1	30	6	36	3	0			1		1	1	1	0	200	0
25	4	25.1	1	0	0	0	1	0	0	0	1	1	1	0	3.5	1	3	2	1	3	120	35	40	38	4	38.5714	2	2	1	2	127	40	40	1	35	10	45	1	2	1		1		1	1	2	0	200	0
33	4	23.9	1	0	0	0	0	0	0	0	1	1	2	4	3.5	1	2	1	1	2	134	45	35	39	1	39.1429	2	2	1	2	145	30	25	1	25	10	35	1	0			1		2	1	1	0	1000	2
27	4	21.7	1	0	0	0	0	0	0	0	1	1	4	8	3.5	1	2	0	1	2	140	59	60	40	4	40.5714	2	2	1	2	160	29	30	3	30	15	45	1	3	1		1		1	1	1	0	250	0
27	1	31.6	1	0	0	0	0	0	0	0	1	1	1	4	2	0								41	0	41	1	2	1	1	125	35	30	1	30	5	35	2	0			1		1	1	2	0	250	0
43	1	29.8	3	0	0	0	1	0	1	3	1	1	12	6	4	1	1	0	1	1	100	70	70	38	1	38.1429	1	2	1	1	140	45	40	1	20	10	30	1	3	1		1		1	1	1	0	200	0
37	4	17.3	2	1	0	0	2	2	0	0	1	0	0	2.5	0.5	0								37	3	37.4286	1	2	1	1	148	47	50	1	15	10	25	3	0			1		1	0	1	0	150	0
24	4	24.4	1	0	0	0	0	0	0	0	1	1	5	8	2	0								41	4	41.5714	1	1	1	1	140	53	50	1	15	10	25	2	0			1		1	0	1	0	150	0
31	4	31.2	3	2	0	0	2	0	1	4	1	1	1.5	1.5	0.25	0								39	2	39.2857	1	1	1	1	110	50	50	1	0	10	10	2	0			1		1	0	1	0	100	0
32	1	18.4	1	0	0	0	0	0	1	2	1	1	4	1	2	0								38	4	38.5714	1	1	1	1	148	48	50	1	0	5	5	2	0			1		1	0	1	0	200	0
30	4	20.2	1	0	0	0	0	0	1	2	1	1	2	3	4	1	3	1	1	3	135	48	50	38	4	38.5714	2	0	1	2	140	41	50	0	20	0	20					2	3	1	0	0	0	200	0
28	4	22.4	1	0	0	0	0	0	0	0	1	1	3	6	2	0								40	4	40.5714	1	2	1	1	182	28	30	1	30	10	40	1	0			1		1	1	1	0	200	0
38	1	25.4	3	1	0	0	4	0	1	11	1	1	3.5	1	3	1	1	0	1	1	120	78	70	38	3	38.4286	1	2	1	1	130	53	50	1	30	15	45	1	0			1		2	1	1	0	500	0
28	4	21.3	1	0	0	0	0	0	0	0	1	1	1	1	3	1	2	0	1	2	124	73	70	37	4	37.5714	2	1	1	2	148	51	50	3	25	10	35	1	0			1		1	1	1	0	150	0
32	5	18.1	1	0	0	0	0	0	0	0	1	0	0	6	0.25	0								39	5	39.7143	1	2	1	1	170	27	30	1	30	25	55	2	0			1		1	0	1	0	50	0
31	4	25.4	1	0	0	0	1	0	0	0	1	1	5	9	3.5	1	2	0	1	2	140	72	70	41	1	41.1429	2	1	1	2	145	49	50	1	30	10	40	1	0			1		1	0	1	0	150	0
36	4	26.2	1	0	0	0	0	0	0	0	1	0	2	2	3	1	1	1	1	1	135	44	50	40	1	40.1429	1	3	1	1	160	26	30	1	40	10	50	1	0			1		1	0	1	0	100	0
24	4	30.4	1	0	0	0	0	0	1	7	1	1				0								39	4	39.5714	1	2	1	1	148	43	40	3	10	10	20	2	0			1		1	0	1	0	50	0
40	1	29.1	9	0	0	0	4	0	0	0	1	0	0	2	0.5	0								38	4	38.5714	1	3	1	1	170	24	20	1	35	15	50	3	0			1		1	0	1	0	100	0
29	4	17.3	2	1	0	0	0	0	0	0	1	0	0	3	1.5	0								40	3	40.4286	1	1	1	1	135	51	50	1	0	25	25	2	0			1		1	0	0	0	50	0
36	4	22.7	1	0	0	0	0	0	1	1	1	1	3	3	1	0								41	5	41.7143	1	2	1	1	153	44	40	1	30	5	35	1	0			1		1	0	1	0	300	0
36	2	27.7	4	3	0	0	1	0	1	3	1	1	2.5	0.5	1	0								38	4	38.5714	1	2	1	1	180	25	30	1	20	5	25	3	0			1		1	0	0	0	100	0
27	4	21.9	2	0	0	0	0	0	1	1	1	1	2	1	3	1	1	1	1	1	129	45	50	41	3	41.4286	1	2	1	1	130	30	40	1	20	10	30	3	0			1		1	0	1	0	50	0
34	4	33.9	1	0	0	0	2	0	1	4	1	1	1	8	3.5	1	2	0	1	2	135	80	80	41	2	41.2857	2	0	1	2	135	80	80	0	15	0	15					2	3	1	0	0	0	600	2
25	4	19.6	1	0	0	0	0	0	0	0	1	1	1	5	4.5	1	3	1	1	3	119	57	40	40	3	40.4286	2	2	1	2	120	35	30	1	35	10	45	1	0			1		1	0	1	0	50	0
26	4	21.1	1	0	0	0	0	0	0	0	1	1	8	4	3	1	1	1	1	1	130	56	60	40	1	40.1429	1	2	1	1	160	33	30	1	30	10	40	1	0			1		1	0	1	0	100	0
26	4	20.7	1	0	0	0	0	0	0	0	1	1	0	4	2	0								40	3	40.4286	1	2	1	1	137	27	35	1	15	5	20	2	0			1		1	0	1	0	150	0
29	1	22.4	1	0	0	0	0	0	1	7	1	1	8	2	3.5	1	1	1	1	1	137	41	50	40	0	40	1	2	1	1	151	32	30	1	30	15	45	1	0			1		1	0	1	0	250	0
30	2	25.7	1	0	0	0	0	0	1	2	1	1	11	6.5	4	1	1	0	1	1	133	54	60	40	5	40.7143	1	1	1	1	145	50	60	1	30	30	60	1	0			1		1	0	1	3	200	0
25	1	32.1	1	0	0	0	4	0	0	0	1	1	10	3.5	4	1	2	0	1	2	166	56	60	37	1	37.1429	2	1	1	2	168	50	50	1	20	5	25	2	0			1		1	0	1	0	50	0
44	4	20.3	5	0	0	0	0	0	1	11	1	1	4	1	1.5	0								38	3	38.4286	1	2	1	1	190	36	30	1	10	5	15	2	0			1		1	0	1	0	200	0
33	4	29.2	2	1	1	0	1	0	0	0	1	1	6	2	1	0								38	5	38.7143	1	2	1	1	139	38	40	1	15	10	25	2	0			1		1	0	1	0	300	0
26	1	21.8	1	0	0	0	4	0	1	11	1	1	2	3	2	0								38	1	38.1429	2	2	1	2	130	35	40	1	30	15	45	1	3	1		1		1	0	1	0	200	0
27	4	24.4	1	0	0	0	0	0	1	1	1	1	4	2	1.5	0								41	3	41.4286	1	1	1	1	152	49	50	1	20	15	35	3	0			1		1	1	1	0	300	0
28	4	18.9	1	0	0	0	0	0	0	0	1	1	3	2	3.5	1	1	0	1	1	130	60	50	39	0	39	1	3	1	1	150	19	10	1	30	5	35	1	0			1		1	1	1	0	100	0
25	4	24.8	1	0	0	0	1	0	0	0	1	1	9	6	3.5	1	1	0	1	1	130	50	60	39	6	39.8571	1	2	1	1	139	40	50	1	25	10	35	3	0			1		1	0	1	0	200	0
33	1	26.7	1	0	0	0	4	0	0	0	1	1	6.5	3.5	4	1	1	0	1	1	156	66	70	39	2	39.2857	1	1	1	1	185	48	50	1	30	10	40	1	0			1		1	1	1	0	400	0
33	4	23.2	2	0	0	0	1	0	1	0	1	1	16	7.5	3	1								41	2	41.2857	1	0	1	1	103	85	90	0	10	0	10					2	3	1	0	0	0	200	0
39	4	23.7	1	0	0	0	1	0	1	3	1	1	12	2.5	1	0								39	2	39.2857	1	2	1	1	167	20	30	1	40	5	45	1	0			1		1	1	1	0	50	0
29	4	22.8	3	0	0	0	4	0	1	1	1	1	6	2	3	1	3	0	1	3	120	68	70	41	6	41.8571	1	3	1	1	142	18	20	1	20	5	25	2	0			1		1	0	1	0	100	0
37	4	18.5	1	0	0	0	4	0	1	7	1	1	12	12	4.5	1	1	1	1	1	120	40	50	39	5	39.7143	1	2	1	1	144	40	40	1	15	5	20	1	0			1		1	1	1	0	1100	2
32	4	18.1	1	0	0	0	4	0	1	11	1	1	1.5	2.5	3.5	1	1	0	1	1	135	58	60	38	5	38.7143	1	2	1	1	179	30	30	1	35	15	50	1	0			1		1	0	1	0	50	0
23	4	26.1	1	0	0	0	1	0	1	3	1	1	5	0.5	3	1								38	6	38.8571	1	2	1	1	156	36	50	1	30	10	40	1	0			1		1	0	1	0	100	0
37	4	22.1	2	0	0	0	4	0	0	0	1	0	0	2	0.25	0								38	6	38.8571	1	2	1	1	135	44	40	1	0	10	10	2	2	2		1		1	0	1	0	50	0
30	2	22.4	3	1	1	0	4	0	0	0	1	1	0	5	2	0								39	2	39.2857	1	2	1	1	150	30	30	1	40	20	60	1	0			1		1	0	1	0	100	0
33	2	24.1	2	1	0	0	1	0	0	0	1	0	1	5	1	0								40	4	40.5714	1	2	1	1	140	42	40	1	30	10	40	1	0			1		1	1	0	0	100	0
32	1	25.2	2	0	0	0	0	0	1	2	1	1	3	2	3.5	1	1	1	1	1	120			37	4	37.5714	1	2	1	1	140	34	35	2	30	5	35	1	0			1		2	0	1	0	400	0
33	1	21.8	1	0	0	0	0	0	0	0	1	0	2	4	2.5	1	1	1	0					41	6	41.8571	1	2	1	1	147	45	40	1	10	13	23	2	0			1		1	1	1	0	1000	2
38	1	25.1	2	1	1	0	1	0	0	0	1	0	2	3	2	0								39	4	39.5714	1	2	1	1	140	28	30	1	10	5	15	2	0			1		1	0	1	0	200	0
32	1	30.1	1	0	0	0	0	2	1	5	1	1	12.5	6.5	3	1	1	1	1	1	135	44	50	41	1	41.1429	1	2	1	1	161	32	40	1	30	20	50	1	0			1		1	1	1	0	200	0
36	4	20.9	2	0	0	0	0	0	0	0	1	1	6	1	3.5	1	1	1	1	1	124	47	50	39	3	39.4286	1	2	1	1	140	40	40	1	30	5	35	1	0			1		1	0	1	0	200	0
35	1	25.4	1	0	0	0	2	0	1	4	1	1	1	1.5	3.5	1	1	1	1	1	112	50	35	41	1	41.1429	1	2	1	1	133	40	40	1	20	5	25	3	0			1		1	0	1	0	950	2
29	1	26.3	1	0	0	0	0	0	0	0	1	1	8	15	1	0								38	5	38.7143	2	2	1	2	120	39	40	1	20	10	30	2	0			1		2	0	1	0	200	0
31	4	23.2	2	1	0	0	0	0	1	1	1	1	7	9	2.5	1	1	0	1	1	118	65	60	41	3	41.4286	1	1	1	1	125	55	50	1	30	15	45	1	0			1		1	1	1	0	300	0
30	4	19.6	1	0	0	0	0	0	0	0	1	1	8	6	3.5	1	1	0	1	1	120	62	70	40	5	40.7143	1	2	1	1	160	39	40	1	35	10	45	1	0			1		1	0	1	0	100	0
32	2	21.9	1	0	0	0	4	0	1	8	1	1	5	1	3.5	1	1	1	1	1	147	52	60	39	2	39.2857	1	2	1	1	150	28	30	1	25	10	35	3	0			1		2	0	1	0	250	0
40	4	28.4	1	0	0	0	1	0	1	3	1	1	0.5	6	1	0								38	6	38.8571	1	0	1	1	121	57	70	0	15	0	15					2	3	1	0	0	0	250	0
32	1	20.4	1	0	0	0	0	0	0	0	1	1	0.5	0.5	4.5	1	1	0	1	1	148	64	70	38	6	38.8571	1	1	1	1	173	53	50	1	30	10	40	1	0			1		1	1	1	0	200	0
37	1	28.7	1	0	0	0	0	0	0	0	1	1	3	2	1	0								41	3	41.4286	1	2	1	1	160	30	20	1	20	10	30	3	0			1		1	0	1	0	50	0
33	4	24.4	1	0	0	0	1	0	1	3	1	1	9	5	2	0								41	3	41.4286	1	2	1	1	150	45	40	1	35	20	55	1	0			1		1	0	1	0	50	0
25	1	25.1	1	0	0	0	1	0	1	7	1	1	2	5	4.5	1	2	0	1	2	137	60	60	40	3	40.4286	2	2	1	2	150	30	20	1	15	11	24	3	0			1		1	0	1	0	100	0
31	1	37.4	1	0	0	0	1	0	1	9	1	1	6	5	2.5	1	1	1	0					41	6	41.8571	1	1	1	1	173	53	60	1	30	15	45	1	0			1		1	1	1	0	200	0
33	4	24.8	1	0	0	0	4	0	0	0	1	1	11	3.5	1	0								40	6	40.8571	1	1	1	1	175	56	60	1	0	7	7	2	0			1		1	1	1	0	400	0
40	4	21.1	3	1	0	0	0	0	0	0	1	0	1	1	2	0								39	6	39.8571	1	1	1	1	145	70	80	1	10	20	30	3	0			1		1	0	0	0	200	0
36	4	17.6	1	0	0	0	0	0	0	0	1	0	2	6	0.5	0								40	4	40.5714	1	2	1	1	160	34	30	1	20	10	30	2	0			1		1	1	1	0	150	0
25	1	28.1	1	0	0	0	1	1	1	6	1	1	12	2	4	1	1	1	1	1	130	50	60	39	2	39.2857	1	2	1	1	140	40	40	1	30	10	40	1	0			1		1	0	1	0	150	0
30	4	20.1	1	0	0	0	4	0	1	11	1	1	14	3	4	1	1	0	1	1	120	60	60	38	3	38.4286	1	2	1	1	140	40	40	1	30	10	40	1	0			1		1	0	1	0	150	0
25	4	26.5	1	0	0	0	1	0	0	0	1	0	3	1	1	0								40	0	40	1	3	1	1	150	20	10	1	30	10	40	3	0			1		1	1	1	0	150	0
26	1	24.9	1	0	0	0	4	0	0	0	1	0	4	3	2	0								40	4	40.5714	1	2	1	1	160	20	20	1	25	10	35	2	0			1		1	1	1	0	200	0
27	2	27.8	2	0	0	0	4	0	1	1	1	1	8	4	3.5	1	2	0	1	2	144	67		41	5	41.7143	2	2	1	2	140	55	60	1	40	20	60	1	0			1		1	1	1	0	450	0
40	1	32.4	3	2	0	0	1	1	1	6	1	1	1	3	0.5	0								38	4	38.5714	2	1	1	2	110	60	60	1	15	20	35	2	0			1		1	0	1	0	100	0
34	1	23.5	4	0	0	0	1	0	1	1	1	1	7	1	2	0								41	3	41.4286	1	2	1	1	150	47	40	1	30	20	50	1	0			1		1	0	1	0	150	0
25	4	25.1	1	0	0	0	1	0	1	3	1	1	10	9	2	0								38	4	38.5714	1	2	1	1	140	40	40	1	30	10	40	1	0			1		1	1	2	0	50	0
32	4	18.6	1	0	0	0	0	0	1	2	1	1	9	9	3	1	1	1	1	1	110	38	40	39	2	39.2857	1	3	1	1	140	33	30	1	30	5	35	1	0			1		1	1	2	0	100	0
28	4	24.2	1	0	0	0	4	0	1	1	1	1	2	2	3	1	2	0	1	2	120	65	70	40	5	40.7143	2	2	1	2	140	40	30	1	30	5	35	1	0			1		1	1	1	0	100	0
28	1	23.1	1	0	0	0	0	0	1	1	1	1	5	2.5	3.5	1	1	1	1	1	156	50	50	41	5	41.7143	1	2	1	1	170	32	30	1	40	10	50	1	0			1		1	0	1	0	150	0
27	4	23.6	1	0	0	0	2	0	1	1	1	1	5	7	4	1								40	6	40.8571	1	2	1	1	135	52	50	1	30	10	40	1	0			1		2	0	1	0	750	2
34	4	22.1	2	0	0	0	0	0	0	0	1	1	8	8	3.5	1								40	2	40.2857	1	2	1	1	144	42	40	1	35	15	50	1	0			1		1	1	0	0	800	3
28	4	24.5	2	0	0	0	0	0	0	0	1	1	8	8	3.5	1	2	0	0					41	1	41.1429	2	2	1	2	157	32	30	1	30	15	45	1	0			1		1	0	1	0	100	0
37	4	20.4	3	0	0	0	0	0	0	0	1	0	0.5	1	2.5	1	1	1	1	1	125	45	50	38	6	38.8571	1	2	1	1	125	35	50	1	10	5	15	2	0			1		1	0	1	0	300	0
38	4	25.3	2	1	0	0	0	0	1	1	1	1	2	2	2	0								41	0	41	1	2	1	1	138	40	40	1	0	10	10	2	0			1		1	0	1	0	200	0
27	4	23.2	2	0	0	0	2	0	1	4	1	1	8	5	2	0								38	1	38.1429	1	0	1	1	102	44	50	0	0	0	0					2	4	1	0	0	0	300	0
33	4	32.7	1	0	0	0	0	0	0	0	1	0	0	2	1	0								39	5	39.7143	1	1	1	1	120	51	40	1	0	8	8	2	0			1		1	0	1	0	200	0
36	1	24.6	3	1	0	0	0	0	0	0	1	0	0	4	1	0								41	0	41	1	2	1	1	150	44	40	1	0	10	10	2	0			1		1	0	1	0	200	0
31	4	20.8	1	0	0	0	0	0	0	0	1	1	0	6	4	1	1	0	1	1	122	56	60	38	5	38.7143	1	2	1	1	154	35	30	1	15	5	20	3	0			1		2	0	1	0	200	0
20	2	26.1	1	0	0	0	0	2	1	5	1	1	7	5	2.5	1	1	1	1	1	122	50	50	38	1	38.1429	1	2	1	1	150	30	30	1	20	5	25	1	0			1		1	0	1	0	150	0
32	4	28.7	1	0	0	0	0	0	0	0	1	1	2	14	3.5	1	1	0	1	1	131	54	50	37	0	37	1	2	1	1	175	29	30	1	35	15	50	1	0			1		1	0	1	0	100	0
28	4	24.4	3	1	1	0	0	0	0	0	1	0	0	0.5	0.5	0								39	6	39.8571	1	1	1	1	153	45	50	1	5	5	10	2	0			1		1	0	1	0	100	0
31	2	24.8	3	1	0	0	0	0	1	1	1	1	7	2	1.5	0								41	6	41.8571	1	2	1	1	146	34	40	1	25	10	35	3	0			1		1	0	0	0	50	0
23	4	23.4	2	0	0	0	4	0	0	0	1	1	2	2	3.5	1	1	1	1	1	105	56	60	40	2	40.2857	1	1	1	1	170	25	30	1	30	10	40	1	0			1		1	0	1	0	50	0
25	4	27.2	1	0	0	0	0	0	0	0	1	0	0	2	2	0								40	4	40.5714	1	3	1	1	175	21	20	1	20	5	25	1	0			1		1	0	1	0	100	0
36	5	21.5	1	0	0	0	0	0	0	0	1	1	3	3	3.5	1	1	0						38	5	38.7143	1	1	1	1	117	60	50	1	30	10	40	1	0			1		1	0	1	0	200	0
34	4	18.1	2	0	0	0	1	0	1	1	1	1	7	4	1	0								41	2	41.2857	1	3	1	1	169	21	20	1	30	10	40	1	0			1		1	0	1	0	50	0
36	4	20.5	2	0	0	0	0	0	0	0	1	1	1	5	3.5	1	1							41	4	41.5714	1	2	1	1	148	48	40	1	30	10	40	1	0			1		1	0	1	0	50	0
25	4	36.7	2	0	0	0	1	0	0	0	1	1	7	7	3.5	1	3	0	1	3	143	83	80	40	0	40	1	1	1	1	180	46	50	1	30	10	40	1	0			1		1	0	1	0	100	0
31	4	37.6	1	0	0	0	3	1	1	3	1	1	4	1	3.5	1	1	0	1	1	130	70	70	37	1	37.1429	1	0	1	1	140	70	70	0	0	0	0					2	3	1	0	0	0	200	0
27	1	33.6	1	0	0	0	0	0	1	1	1	1	6	3	0.5	0								41	4	41.5714	1	2	1	1	120	30	30	1	30	10	40	1	0			1		1	0	1	0	450	0
31	4	18.7	1	0	0	0	0	0	0	0	1	1	3	2	3.5	1								40	5	40.7143	1	2	1	1	150	44	50	1	30	5	35	1	0			1		1	0	2	0	500	0
26	4	27.2	2	0	0	0	0	0	0	0	1	0	5	2	2	0								40	0	40	2	1	1	2	140	47	50	1	30	0	30	3	3	1		2	6	1	0	0	0	300	0
33	4	19.9	1	0	0	0	0	0	0	0	1	1	0	2	4	1	1	1	1	1	147	47	50	40	2	40.2857	1	2	1	1	139	40	40	1	40	10	50	1	0			1		1	1	1	0	300	0
30	4	25.7	1	0	0	0	0	0	1	1	1	1	5	2	2	0								41	1	41.1429	1	2	1	1	144	47	50	1	35	15	50	1	2	1		1		1	0	1	0	250	0
31	2	27.7	1	0	0	0	0	0	0	0	1	1	0	5	3	1	1	1	1	1	110	57	60	38	6	38.8571	1	2	1	1	135	44	50	1	30	6	36	1	0			1		1	0	1	0	100	0
22	4	25.8	1	0	0	0	0	0	0	0	1	1	5	8	3.5	1	1	1	1					39	1	39.1429	1	2	1	1	168	35	40	1	35	10	45	1	0			1		1	0	1	0	300	0
31	4	18.9	1	0	0	0	0	0	0	0	1	0	0	6	0.5	0								37	2	37.2857	1	1	1	1	148	51	50	3	30	10	40	1	0			1		1	1	1	0	700	1
30	4	29.6	2	0	0	0	0	0	0	0	1	1	8	2	4	1	1	0	1	1	114	68	70	41	5	41.7143	1	1	1	1	124	50	60	1	40	5	45	1	0			1		1	0	1	0	100	0
35	1	25.7	1	0	0	0	0	0	0	0	1	1	15	7	4	1	1	0	0					40	1	40.1429	1	2	1	1	144	34	40	1	35	10	45	3	0			1		1	1	1	0	200	0
20	1	20	1	0	0	0	0	2	1	5	1	1	1	4.5	0.5	0								39	3	39.4286	1	2	1	1	146	33	40	1	29	6	35	3	0			1		1	0	1	0	300	0
29	4	20.8	3	0	0	0	4	0	0	0	1	1	5	3	3.5	1	1	1	1	1	127	53	60	38	0	38	1	2	1	1	162	38	40	1	35	10	45	1	0			1		2	0	1	0	1200	2
23	1	26.3	1	0	0	0	0	0	0	0	1	0	2	3	0.5	0								39	0	39	1	2	1	1	144	20	20	1	30	4	34	3	0			1		1	1	1	0	100	0
35	1	20.7	1	0	0	0	0	0	0	0	1	1	9	5	4	1	1	1	1	1	122	54	60	40	5	40.7143	1	2	1	1	129	46	50	1	40	5	45	1	0			1		2	0	1	0	200	0
29	4	24.4	2	0	0	0	4	0	1	1	1	1	7	1.5	3.5	1	1	0	0					41	2	41.2857	1	2	1	1	140	40	40	1	20	3	23	3	0			1		1	0	1	0	200	0
30	2	24.5	1	0	0	0	0	0	0	0	1	1	10	4	4	1	1	0	1	1	87	60	60	41	0	41	1	1	1	1	97	58	60	1	32	8	40	1	0			1		1	0	1	0	700	3
28	4	23.1	1	0	0	0	1	0	0	0	1	1	1	6	1	0								39	2	39.2857	1	1	1	1	117	51	50	1	30	5	35	1	0			1		1	0	1	0	850	2
39	4	22.8	4	0	0	0	4	0	1	1	1	1	8	6	4	1	1	1	1	1	144	43	40	42	0	42	1	2	1	1	153	35	30	1	36	4	40	1	0			1		1	0	1	0	150	0
26	1	18.2	2	0	0	0	0	0	0	0	1	1	2	2.5	4	1	1	1	1	1	121	51	50	37	4	37.5714	1	2	1	1	144	40	30	1	40	2	42	1	0			1		1	0	1	0	100	0
34	2	18.7	2	1	0	0	0	0	0	0	1	0	0	0.5	0.5	0								39	5	39.7143	1	2	1	1	124	50	50	1	25	5	30	2	0			1		1	0	0	0	100	0
25	4	24.3	1	0	0	0	0	1	1	6	1	1	8	6	4	1	1	0	0					38	2	38.2857	1	2	1	1	134	49	50	1	25	10	35	2	0			1		1	0	1	0	200	0
30	4	21.5	3	0	0	0	4	2	1	5	1	1	6	2	2	0								39	2	39.2857	1	3	1	1	180	23	30	1	40	4	44	1	0			1		1	1	1	0	100	0
36	4	30.5	1	0	0	0	0	1	1	6	1	1	16	1	2.5	1	1	1	1	1	120	60	60	37	0	37	1	2	1	1	125	40	40	1	40	15	55	1	0			1		1	1	1	0	200	0
38	4	28.2	1	0	0	0	0	0	1	8	1	1	7	3	0.5	0								39	4	39.5714	1	2	1	1	151	40	40	1	0	20	20	2	0			1		1	0	1	0	100	0
41	4	28.7	1	0	0	0	1	1	1	3	1	1	6	7	3.5	1	1	0	1	1	131	65	60	39	1	39.1429	1	1	1	1	120	54	50	1	30	10	40	1	0			1		1	0	1	0	750	2
23	2		3	1	0	0	0	0	1	2	1	1	14	9	1	0								38	0	38	2	1	1	2	110	59	60	1	5	6	11	2	2	1		1		1	1	1	1	200	0
31	2	20.7	2	0	0	0	0	0	1	1	1	1	7	3	1	0								41	2	41.2857	1	2	1	1	151	33	30	1	30	15	45	3	0			1		1	1	1	0	250	0
29	4	22.5	2	0	0	0	0	0	0	0	1	0	9	4	1	0								41	0	41	2	2	1	2	149	51	50	1	25	6	31	1	0			1		1	1	1	0	200	0
34	4	19.9	1	0	0	0	0	0	1	1	1	1	4	5	3	1	1							41	6	41.8571	1	2	1	1	140	20	20	1	35	5	40	1	0			1		1	1	1	0	250	0
29	2	28.4	2	1	1	0	0	0	1	2	1	1	5	4	2	1	2	1	1	2	129	56	60	39	6	39.8571	1	2	1	1	175	34	30	1	30	10	40	3	0			1		1	0	1	0	600	1
31	2	33.1	1	0	0	0	1	0	1	3	1	1	1	4	3.5	1	1	1	1	1	113	58	50	39	1	39.1429	1	3	1	1		40	30	1	30	5	35	1	0			1		1	0	1	0	100	0
27	4	29.6	1	0	0	0	1	1	1	6	1	1	16	6	3.5	1	1	1	1	1	134	46	50	38	2	38.2857	1	2	1	1	165	28	30	1	40	10	50	1	0			1		1	0	1	0	530	0
31	4	23.2	3	2	0	0	1	0	1	3	1	0	0	4	0.5	0								38	2	38.2857	1	2	1	1	165	34	30	1	20	10	30	1	0			1		1	0	1	0	50	0
28	4	30.4	2	1	0	0	0	0	0	0	1	1	1	4	3	1	2	1	1	2	133	65	70	39	0	39	2	1	1	2		30	30	1	25	5	30	1	0			1		1	0	1	0	100	0
36	1	24.2	1	0	0	0	1	0	0	0	1	1	7	6	3.5	1	1	1	1	1	130	41	40	40	4	40.5714	1	2	1	1	150	29	30	1	35	25	60	3	0			1		1	1	1	0	300	0
30	1	31.6	3	1	0	0	4	0	0	0	1	1	8	2	3	1	2	0	0					40	4	40.5714	2	0	1	2	120	52	60	0	0	0	0					2	3	1	0	0	0	400	0
26	4	36	4	1	0	0	0	0	1	7	1	1	1	2	1	0								39	2	39.2857	1	2	1	1	150	17	30	1	30	5	35	1	0			1		1	0	1	0	150	0
29	2	27.5	2	0	0	0	4	0	0	0	1	1	14	3.5	3.5	1	1	1	1	1	130	50	50	38	5	38.7143	1	2	1	1	140	27	25	1	30	10	40	3	0			1		1	1	1	0	100	0
30	2	21.3	1	0	0	0	4	0	1	2	1	1	12	3	3	1	1	1	0					37	1	37.1429	1	2	1	1	149	57	60	1	40	10	50	1	0			1		1	0	1	0	150	0
36	2	26.9	5	2	0	0	0	0	0	0	1	0	6	1	0.5	0								40	3	40.4286	1	0	1	1	90	68	70	0	0	0	0					2	3	1	0	0	0	1000	3
37	2	26.5	4	2	0	0	0	1	1	6	1	1	4.5	1	1.5	0								38	0	38	2	2	1	2	136	48	50	1	20	11	31	1	0			1		1	0	1	0	300	0
28	4	22	1	0	0	0	0	0	0	0	1	1	12	4	3.5	1	1	1	1	1	108	56	55	40	2	40.2857	1	1	1	1	128	60	50	1	0	0	0		0			2	3	1	0	0	0	200	0
27	4	19.9	2	0	0	0	0	0	0	0	1	1	2	3	3	1	1	1	1	1		56	50	41	5	41.7143	1	2	1	1		36	35	1	30	5	35	1	0			1		1	0	1	0	250	0
32	4	20.1	2	1	0	0	0	0	0	0	1	0	1	2	0.5	0								40	5	40.7143	1	2	1	1	165	24	20	1	0	20	20	2	0			1		1	1	1	0	50	0
32	1	23.4	1	0	0	0	4	0	1	1	1	1	7	3	3.5	1	3	1	0	3	150	55		41	4	41.5714	2	1	1	2	145	35	35	1	0	16	16	1	2	1		2	6	1	0	0	0	200	0
36	1	18	1	0	0	0	0	0	1	1	1	0	10	5	2.5	1								41	6	41.8571	1	2	1	1	121	42	40	1	40	5	45	1	0			1		1	0	1	0	250	0
19	4	23	1	0	0	0	4	0	1	2	1	1	18	8	3.5	1	2	1	1	2	111	54		37	4	37.5714	2	2	1	2	142	31	30	1	35	20	55	1	2	1		1		1	1	1	0	300	0
28	4	21.1	2	0	0	0	0	3	0	0	1	1	2	14	3.5	1	2	0	1	2	109	74	70	39	3	39.4286	2	1	1	2	156	55	55	1	40	15	55	1	0			1		1	1	1	0	100	0
33	4	23.9	1	0	0	0	2	0	1	4	1	1	5	5	3.5	1	1	1	0					39	6	39.8571	1	3	1	1	172	30	30	1	35	10	45	1	0			1		1	0	1	0	300	0
32	4	22	1	0	0	0	0	0	0	0	1	1	6	5	4	1	1	1	1	1	136	60	60	40	5	40.7143	1	2	1	1	130	52	50	1	30	5	35	1	0			1		1	0	1	0	100	0
35	1	32.1	1	0	0	0	0	0	1	2	1	1	7.5	1	3	1	1	1	0					39	5	39.7143	1	2	1	1	133	53	50	1	40	3	43	1	0			1		1	1	1	0	800	3
40	4	19.6	6	2	0	0	4	0	1	1	1	0	7.5	1	0.5	0								41	1	41.1429	1	1	1	1		43	40	1	30	6	36	3	0			1		1	0	0	0	50	0
33	4	26	4	1	0	0	0	0	0	0	1	0	2	2.5	1.5	0								39	6	39.8571	1	3	1	1	154	42	40	1	30	10	40	3	0			1		1	0	0	0	100	0
29	4		3	0	0	0	4	0	1	11	1	1	7	4	4	1	1	0	1	1	106	73	60	38	5	38.7143	1	1	1	1	145	47	45	1	30	10	40	1	0			1		1	0	1	0	1000	3
45	4	24.8	3	0	0	0	1	0	0	0	1	0	4	0	0.5	0								40	0	40	1	2	1	1	141	30	30	1	20	5	25	3	0			1		1	0	1	0	100	0
29	4	23.9	2	0	0	0	1	0	0	0	1	1	2	1	3	1	1	1	1	1	121	55	55	41	4	41.5714	1	2	1	1	121	41	40	1	35	4	39	3	0			1		1	0	1	0	100	0
27	4	20.7	1	0	0	0	0	0	1	1	1	1	2	1	3.5	1	1	0	0					41	5	41.7143	1	2	1	1	124	50	50	1	35	15	50	1	0			1		1	0	1	0	150	0
31	2	33.6	5	2	1	0	4	0	0	0	1	1	5	3	4	1	1	1	1	3	120	66	60	40	6	40.8571	3	1	1	3	125	54	50	1	30	7	37	1	0			1		1	1	1	0	150	0
33	1	24.7	3	1	0	0	4	0	1	11	1	1	10	1	0.25	0								40	0	40	1	1	1	1	147	35	35	3	0	2	2	2	0			1		1	0	1	0	200	0
26	2	22.3	1	0	0	0	0	0	0	0	1	1	2	8	4	1	1	1	1	1	123	51	50	39	5	39.7143	1	1	1	1	133	40	40	1	40	13	53	1	3	1		1		1	1	1	0	200	0
29	1	36	2	1	0	0	1	0	0	0	1	0	0.5	0.5	2	0								40	4	40.5714	2	0	1	2	140	70	70	0	0	0	0					2	3	1	0	0	0	300	0
37	2	33	3	1	1	0	0	0	0	0	1	0	0	5	2	0								39	4	39.5714	1	1	1	1	153	65	65	1	30	3	33	1	0			1		1	0	1	0	400	0
36	4	18.1	1	0	0	0	1	0	0	0	1	1	2.5	2.25	4	1	1		0					39	0	39	1	3	1	1	130	30	30	1	30	10	40	1	0			1		1	0	1	0	200	0
30	4	19.7	2	0	0	0	2	0	1	4	1	1	3.25	4	1.5	0								39	2	39.2857	1	3	1	1	157	30	30	1	40	3	43	1	0			1		1	0	1	0	50	0
33	4	18.7	1	0	0	0	4	0	0	0	1	1			5	1	1	1	0					39	5	39.7143	1	2	1	1	160	37	35	1	30	4	34	1	0			1		1	0	2	0	100	0
34	4	24.6	1	0	0	0	0	0	0	0	1	0	2	4	1.5	0								38	2	38.2857	1	2	1	1	142	20	20	1	15	1	16	2	0			1		1	0	1	0	100	0
23	4	41.9	1	0	0	0	0	0	1	1	1	1	11.5	3.5	3	1	1	1	1	1	140	65	60	41	3	41.4286	1	2	1	1	160	34	30	1	30	10	40	1	0			1		1	0	1	0	300	0
24	1	24.2	1	0	0	0	0	0	1	7	1	1	6	2.5	2.75	1								40	5	40.7143	1	2	1	1	151	47	45	3	20	5	25	3	0			1		1	0	1	0	100	0
16	1	23.6	1	0	0	0	4	0	0	0	1	1	9	1	4	1	1	1	1	1	151	42	40	39	6	39.8571	1	2	1	1	155	39	35	1	40	10	50	1	0			1		1	1	1	0	550	3
25	4	19.9	1	0	0	0	4	0	0	0	1	1	1.25	2.5	3	1	1	1	0					40	1	40.1429	1	2	1	1	138	44	40	1	10	5	15	2	0			1		1	0	1	0	100	0
39	1	32.3	3	0	0	0	1	0	1	3	1	1	8	2	4	1	1	1	1	1	119	45	40	39	2	39.2857	1	2	1	1	155	43	40	3	30	15	45	3	0			1		1	0	1	0	100	0
32	4	18.7	2	0	0	0	0	0	1	2	1	1	3	2	4	1	1	1	0					40	5	40.7143	1	2	1	1	151	36	35	1	40	10	50	1	0			1		1	0	1	0	1500	2
33	1	27.6	4	2	0	0	0	0	0	0	1	1			2	0								40	2	40.2857	1	0	1	1	122	76	75	0	0	0	0					2	4	1	0	0	0	150	0
29	1	18.5	1	0	0	0	1	0	1	3	1	1	7	2	4	1	1	1	1	1	121	60	60	38	4	38.5714	1	3	1	1	168	20	20	1	30	5	35	1	0			1		1	1	1	0	150	0
35	1	19.6	2	0	0	0	0	0	0	0	1	1	0	0	4	1	1	1	1	1	130	57	60	40	5	40.7143	1	1	1	1	150	57	55	3	30	5	35	1	0			1		1	1	1	0	450	0
44	4	24.8	2	0	0	0	1	0	1	8	1	1	13	2	3.5	1	2	0	1	1	124	69	70	39	4	39.5714	2	2	1	2	138	47	45	1	30	5	35	1	0			1		1	1	1	0	200	0
36	4	24	4	0	0	0	0	0	0	0	1	1	7	13	3.5	1	1	1	1	1	151	64	60	40	2	40.2857	1	2	1	1	171	55	55	1	30	7	37	1	0			1		2	0	2	0	350	0
39	4	28.5	1	0	0	0	1	1	1	6	1	1	8	3.5	4	1	1	1	1	1	148	50	50	38	2	38.2857	1	2	1	1	153	35	35	1	30	12	42	1	0			1		1	0	1	0	200	0
30	4	31.1	1	0	0	0	0	0	0	0	1	1	3	5	1.5	0								40	4	40.5714	1	2	1	1	140	35	30	1	30	10	40	1	0			1		1	0	1	0	200	0
31	1	20.6	1	0	0	0	0	0	1	2	1	1	2.5	5.5	4.5	1	1	0	0					40	3	40.4286	1	0	1	1	117	29	30	0	30	0	30					2	3	1	0	0	0	600	0
33	4	35.1	2	0	0	0	1	0	1	3	1	1	11	10	4	1	1	1	1	1	135	50	50	39	3	39.4286	1	2	1	1	138	38	40	1	30	5	35	1	0			1		1	0	1	0	150	0
37	4	21.8	6	4	1	0	0	2	1	5	1	0	3.5	0.5	0.75	0								39	1	39.1429	2	0	1	2	118	60	60	1	14	5	19	3	0			1		1	0	2	0	700	1
31	4	20.6	2	1	1	0	0	0	0	0	1	1	1	2	2.5	1	1	1	0					40	3	40.4286	1	2	1	1	134	50	50	1	45	5	50	1	0			1		1	0	1	0	200	0
28	2	21.6	2	0	0	0	0	0	0	0	1	0	15	2	1.5	0								41	1	41.1429	2	3	1	2	153	40	40	1	25	5	30	2	0			1		1	0	1	0	300	0
26	1	30.1	1	0	0	0	0	1	1	2	1	1	4	2	4	1	1	1	1	1	165	30	30	37	2	37.2857	1	2	1	1	170	23	20	1	30	2	32	1	0			1		1	1	1	0	300	0
30	4	25.8	2	0	0	0	0	0	0	0	1	1	3	2	4	1	1	1	1	1	130	43	45	41	0	41	1	1	1	1	138	36	35	1	30	3	33	1	0			1		2	0	1	0	350	0
26	1	22.2	1	0	0	0	0	0	0	0	1	1	3.75	1.75	3.25	1	1	1	1	1	130	51	50	40	3	40.4286	1	2	1	1	147	42	40	1	20	10	30	3	0			1		1	0	1	0	250	0
30	4	19.8	1	0	0	0	0	0	1	1	1	1	18	2	3	1	1	0	1	1	146	65	65	41	4	41.5714	1	2	1	1		60	60	1	30	12	42	1	0			1		1	0	1	0	200	0
33	4	27	5	1	0	0	0	0	1	1	1	1	9	1.5	2	1	1	1	1	1	124	65	60	41	2	41.2857	1	2	1	1	159	55	55	1	30	3	33	3	0			1		1	0	1	0	100	0
29	4	23.8	1	0	0	0	0	0	1	2	1	1	9	4	4	1	1	1	1	1	120	64	60	40	1	40.1429	1	2	1	1	130	55	50	1	30	2	32	1	0			1		1	0	1	0	150	0
33	1	22.4	1	0	0	0	0	0	1	1	1	1	2.5	5	3	1	1	1	1	1	132	45	45	41	3	41.4286	1	2	1	1	146	35	35	1	30	5	35	1	0			1		2	0	1	0	350	0
41	4	34.6	2	0	0	0	1	0	0	0	1	0	0	1	1	0								40	4	40.5714	1	2	1	1	146	25	20	1	30	5	35	1	0			1		1	0	1	0	400	0
29	1	21.3	1	0	0	0	0	0	0	0	1	0	3.5	2.75	1.5	0								41	0	41	1	3	1	1	163	26	25	1	20	15	35	3	0			1		1	0	2	0	600	1
31	4	22.8	1	0	0	0	4	0	1	1	1	1	5.5	1.5	4	1	1	1	1	1	130	60	60	41	6	41.8571	1	2	1	1	150	45	45	1	30	7	37	1	0			1		1	0	1	0	150	0
31	4	24	1	0	0	0	0	0	0	0	1	1	10	10	4	1	1	1	1	1	122	63	65	39	5	39.7143	1	1	1	1	133	42	45	1	25	10	35	1	0			1		2	1	1	0	1200	2
38	4	22	2	1	1	0	0	0	0	0	1	1	4.5	2	1	0								39	0	39	1	2	1	1		43	45	1	15	5	20	2	0			1		1	0	1	0	100	0
33	4	22.1	1	0	0	0	0	0	0	0	1	1	3	3	4	1	1	0	0					38	3	38.4286	1	2	1	1	140	50	50	1	30	3	33	1	0			1		1	0	1	0	100	0
26	4	33.1	1	0	0	0	0	0	0	0	1	0	2	0.25	0.25	0								40	4	40.5714	1	1	1	1	145	42	45	1	0	3	3	2	0			1		1	0	1	0	100	0
23	4	18.7	1	0	0	0	0	0	0	0	1	0	0.5	7.5	2	1	2	1	1	1	143	54	55	39	1	39.1429	1	2	1	1	164	43	40	1	10	5	15	3	0			1		1	0	3	0	400	0
24	1	17.2	1	0	0	0	0	0	0	0	1	0	4	2	1.5	0								40	6	40.8571	1	2	1	1	150	47	50	1	5	7	12	3	0			1		1	0	1	0	350	0
24	1	21.9	1	0	0	0	4	0	1	8	1	1	5.5	2.5	4.5	1	1	1	1	1	128	49	45	39	1	39.1429	1	2	1	1	153	23	25	1	38	7	45	1	0			1		1	0	1	0	150	0
24	1	34.2	1	0	0	0	0	0	1	2	1	1	14	3	5.5	1	2	1	1	2	104	45	45	41	3	41.4286	1	2	1	1	128	12	10	1	35	10	45	1	0			1		1	0	1	0	250	0
26	4	25.4	1	0	0	0	0	1	1	6	1	1	11	3	4	1	1	1	1	1	104	53	50	39	2	39.2857	1	2	1	1	141	42	30	1	30	5	35	1	0			1		1	0	1	0	350	0
34	4	20	1	0	0	0	0	2	1	5	1	1	2.5	3	2.5	1								38	3	38.4286	1	2	1	1	162	36	35	1	30	10	40	1	0			1		1	0	1	0	50	0
29	1	22.3	1	0	0	0	0	0	1	2	1	1	3	1	3.5	1	1	1	1	1	134	35	35	40	2	40.2857	1	2	1	1	156	30	30	1	10	3	13	2	0			1		1	1	1	0	350	0
36	1	22.2	1	0	0	0	0	0	1	1	1	1	16	4.5	3.5	1	1	0	1	1	126	57	55	41	3	41.4286	1	2	1	1	158	43	40	1	10	10	20	2	0			1		1	0	3	3	100	0
36	4	22.1	1	0	0	0	1	0	1	11	1	1	12	5	2	0								40	0	40	1	2	1	1	170	36	40	1	30	22	52	1	3	1		1		1	1	1	0	500	0
38	4	25.9	1	0	0	0	1	0	0	0	1	0	9	4	2	0								39	2	39.2857	1	0	1	1	115	74	80	0	0	0	0					2	3	1	0	0	0	400	0
29	2	24.7	1	0	0	0	4	0	0	0	1	0	6	1.5	2	1	1	1	1	1	132	55	50	40	1	40.1429	1	2	1	1	150	48	45	1	30	3	33	1	0			1		1	0	1	0	150	0
21	4	25.4	1	0	0	0	2	0	1	4	1	1	9	2	3.5	1	1	0	1	1	132	75	70	37	6	37.8571	1	1	1	1	149	64	60	1	30	3	33	1	0			1		1	0	1	0	50	0
[truncated: 10 more columns]
